# Supplementary material for: Cohort profile: a longitudinal study of HIV infection in the central nervous system with focus on cerebrospinal fluid – the Gothenburg HIV CSF Study Cohort
Source: PubMed Central journal article supplement (PMC10193099; doi:10.1136/bmjopen-2022-070693), 2023-05-17
Supplement: bmjopen-2022-070693.draft_revisions.pdf [file bmjopen-2022-070693.draft_revisions.pdf]

# BMJ Open

BMJ Open is committed to open peer review. As part of this commitment we make the peer review history of every article we publish publicly available.

When an article is published we post the peer reviewers' comments and the authors' responses online. We also post the versions of the paper that were used during peer review. These are the versions that the peer review comments apply to.

The versions of the paper that follow are the versions that were submitted during the peer review process. They are not the versions of record or the final published versions. They should not be cited or distributed as the published version of this manuscript.

BMJ Open is an open access journal and the full, final, typeset and author-corrected version of record of the manuscript is available on our site with no access controls, subscription charges or pay-per-view fees (<http://bmjopen.bmj.com>).

If you have any questions on BMJ Open's open peer review process please email [info.bmjopen@bmj.com](mailto:info.bmjopen@bmj.com)

# BMJ Open

## **Cohort profile: A longitudinal study of HIV infection in the central nervous system with focus on cerebrospinal fluid- The Gothenburg HIV CSF Study Cohort**

|                               |                                                                                                                                                                                                                                                                                                      |
|-------------------------------|------------------------------------------------------------------------------------------------------------------------------------------------------------------------------------------------------------------------------------------------------------------------------------------------------|
| Journal:                      | <i>BMJ Open</i>                                                                                                                                                                                                                                                                                      |
| Manuscript ID                 | bmjopen-2022-070693                                                                                                                                                                                                                                                                                  |
| Article Type:                 | Cohort profile                                                                                                                                                                                                                                                                                       |
| Date Submitted by the Author: | 01-Dec-2022                                                                                                                                                                                                                                                                                          |
| Complete List of Authors:     | Hagberg, Lars; University of Gothenburg, Department of Infectious Diseases<br>Gisslén, Magnus; University of Gothenburg Sahlgrenska Academy, Department of Infectious Diseases, Institute of Biomedicine; Sahlgrenska University Hospital, Department of Infectious Diseases, Region Västra Götaland |
| Keywords:                     | HIV & AIDS < INFECTIOUS DISEASES, MICROBIOLOGY, Infectious disease/HIV < NEUROLOGY                                                                                                                                                                                                                   |
|                               |                                                                                                                                                                                                                                                                                                      |

SCHOLARONE™  
Manuscripts

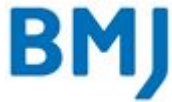

I, the Submitting Author has the right to grant and does grant on behalf of all authors of the Work (as defined in the below author licence), an exclusive licence and/or a non-exclusive licence for contributions from authors who are: i) UK Crown employees; ii) where BMJ has agreed a CC-BY licence shall apply, and/or iii) in accordance with the terms applicable for US Federal Government officers or employees acting as part of their official duties; on a worldwide, perpetual, irrevocable, royalty-free basis to BMJ Publishing Group Ltd ("BMJ") its licensees and where the relevant Journal is co-owned by BMJ to the co-owners of the Journal, to publish the Work in this journal and any other BMJ products and to exploit all rights, as set out in our [licence](#).

The Submitting Author accepts and understands that any supply made under these terms is made by BMJ to the Submitting Author unless you are acting as an employee on behalf of your employer or a postgraduate student of an affiliated institution which is paying any applicable article publishing charge ("APC") for Open Access articles. Where the Submitting Author wishes to make the Work available on an Open Access basis (and intends to pay the relevant APC), the terms of reuse of such Open Access shall be governed by a Creative Commons licence – details of these licences and which [Creative Commons](#) licence will apply to this Work are set out in our licence referred to above.

Other than as permitted in any relevant BMJ Author's Self Archiving Policies, I confirm this Work has not been accepted for publication elsewhere, is not being considered for publication elsewhere and does not duplicate material already published. I confirm all authors consent to publication of this Work and authorise the granting of this licence.

1  
2  
3  
4  
5  
6  
7  
8  
9  
10  
11  
12  
13  
14  
15  
16  
17  
18  
19  
20  
21  
22  
23  
24  
25  
26  
27  
28  
29  
30  
31  
32  
33  
34  
35  
36  
37  
38  
39  
40  
41  
42  
43  
44  
45  
46  
47  
48  
49  
50  
51  
52  
53  
54  
55  
56  
57  
58  
59  
60

## BMJ Open Cohort profile

**Title:** Cohort profile: A longitudinal study of HIV infection in the central nervous system with focus on cerebrospinal fluid-The Gothenburg HIV CSF Study Cohort

Authors: Lars Hagberg<sup>1,2</sup>, Magnus Gisslén<sup>1,2</sup>

1. Department of Infectious Diseases, Institute of Biomedicine, Sahlgrenska Academy, University of Gothenburg, Gothenburg, Sweden
2. Region Västra Götaland, Sahlgrenska University Hospital, Gothenburg, Sweden

Corresponding author: Lars Hagberg.

Postal address: Dept of Infectious Diseases, Sahlgrenska University Hospital SE 416 85 Gothenburg, Sweden.

Email: [lars.hagberg@gu.se](mailto:lars.hagberg@gu.se)

Word count: 3373

## ABSTRACT

**Purpose:** In order to enable long-term follow-up of the natural course of HIV infection in the central nervous system (CNS), a longitudinal cohort study with repeated cerebrospinal fluid (CSF) analyses at intervals over time was initiated in 1985. When antiretrovirals against HIV were introduced, short- and long-term effects of various antiretroviral treatment (ART) regimens were added.

**Participants:** Adults people living with HIV (PLWH) were included. Most participants were asymptomatic which distinguishes this cohort from other similar studies. Since lumbar puncture (LP) is an invasive procedure, some PLWH withdraw their consent. Furthermore, some participants were lost to follow-up. Of 662 PLWH where an initial LP was done, 415 agreed to continue. Among the 415, 56 only gave permission to be followed with LP for less than 1 year, mainly to analyze the short-term effect of ART. The remaining 359 PLWH were followed-up with repeated LP for periods ranging from > 1 to 30 years, defined as the “longitudinal cohort”. On 7 April 2022, 2,650 samplings of paired CSF/blood had been performed, providing a unique biobank.

**Findings to date:** A general finding was that HIV infection in the CNS, as mirrored by CSF findings, appears early in the infectious course of the disease, and progresses slowly in the vast majority of untreated PLWH. Combination ART has been highly effective in reducing CSF viral counts, inflammation, and markers of neural damage. Minor CSF signs of long-term sequels or residual inflammatory activity and CSF escape (viral CSF blips) have been observed. The clinical impact of these findings require further studies.

**Future plans:** PLWH today have a long life expectancy. Our cohort provides an unique opportunity to study long-term effects on CNS HIV infection and the impact of ART.

**Keywords:** HIV infection, central nervous system, cerebrospinal fluid

### Strengths and limitations

- Difficult to follow the protocol with yearly repeated LP in several participants due to consent and Covid-19 pandemic.
- Infrequent use of extensive neuropsychiatric testing.
- Only limited number of participants suffering from severe neurological complications and opportunistic CNS infections.
- Strength of our study is its uniquely long follow-up time, with CSF data from a population of PLWH with a predominately neuroasymptomatic clinical appearance, together with full clinical history including comorbidities, treatment and laboratory data.
- A strict protocol for collecting and storing CSF/blood samples at one center, and only engaging a handful of clinicians to enhance consistency and uniformity is another strength.

## INTRODUCTION

Chronic untreated HIV infection causes progressive immunodeficiency that leads to AIDS in a median of 10 or 11 years after a primary infection. Before effective treatment was available, HIV-associated dementia was frequently observed in the late stages of the infection. The introduction of combination antiretroviral treatment (ART), that preserves or restores immune functions has had a major impact on morbidity and mortality. It has also resulted in a marked reduction of HIV-associated dementia and other neurologic complications. (1) Nevertheless, mild forms of HIV-associated neurocognitive disorders have frequently been reported even during suppressive ART. (2) The research questions for the present study have been: Can biomarkers in cerebrospinal fluid (CSF) be used to chart the natural course of central nervous system (CNS) HIV infection, and can we determine the short and long-term effects of ART?

### Cohort description and method

#### Study population

The study was initiated in 1985 when two patients attending our clinic presented with Guillain Barre syndrome as a complication to HIV infection and exhibited HIV isolated in the CSF. (3) Later we found that HIV-1 could also be isolated in CSF of virus carriers who had no neurological symptoms. (4) At that time, it was not known that HIV was neurotropic.

Since 1985, HIV-infected people living with HIV (PLWH) in the Gothenburg area of Sweden have been enrolled in a longitudinal study with serial sampling of CSF and blood. Lumbar punctures (LP) are performed annually, if possible, or more frequently in connection with introduction or cessation of ART. Both PLWH with neurological or other clinical symptoms of HIV, and asymptomatic PLWH have been included in the study.

1  
2  
3  
4  
5  
6  
7  
8 Of 662 PLWH in whom an initial LP was done, 415 PLWH agreed to continue with follow-  
9  
10 up. Among the 415, 56 only gave permission to be followed with LP for less than 1 year,  
11  
12 mainly to analyze the short-term effect of ART. The remaining 359 PLWH were followed  
13  
14 with repeated LP for periods > 1 up to 30 years. This group was defined as the “longitudinal  
15  
16 cohort” (see flow chart, Fig.1). The 247 PLWH who participated with only one CSF/blood  
17  
18 sampling have been included in many cross-sectional studies. At the conclusion of the study,  
19  
20 on 7 April 2022, 2,650 LP and samplings of paired CSF/blood had been performed, providing  
21  
22 a unique biobank.  
23  
24  
25  
26  
27

### 28 Longitudinal cohort

29  
30 In total, 359 PLWH were followed with a mean number of 6.26 (range 2–30) LP and  
31  
32 CSF/blood analyses over a mean period of 6.89 years (range 1–30 years). Patient  
33  
34 characteristics, time of follow-up, and number of CSF analyses is shown in Table 1.  
35  
36  
37  
38  
39

#### 40 **Table 1. Longitudinal cohort characterization**

41  
42  
43 Number of participants followed > 1 year: 359  
44  
45 Mean time of follow-up: 7 years (range 1–30)  
46  
47 Number of lumbar punctures/individuals: 6 (range 2–30)  
48  
49 Age at inclusion, mean: 41 years (range 17–73)  
50  
51 Gender, male/female: 247/112  
52  
53 Geographic background (n):  
54  
55 Sweden 182  
56  
57 Europe (outside Sweden) 37  
58  
59 Africa 93  
60  
61 Asia 35



1  
2  
3 Middle East 3

4  
5 America 9

6  
7 HIV1/HIV2 356/3

8 mean CD4<sup>+</sup> cells at inclusion: 369 x10<sup>6</sup>/L (range 0–2131)

9  
10 CDC classification<sup>1</sup> at inclusion: A1-A3 n = 244; B1-B3 n = 34; C1-C3 (AIDS) n = 81

11  
12 ART at inclusion (n): No treatment: 298 (of whom 31 had primary infection)

13  
14 Treatment suppressed: 49

15  
16 Treatment failure: 11

17  
18 Treatment interruption: 1

19  
20 Neurology at inclusion (n): Neuroasymptomatic: 328

21  
22 CNS opportunist: 12

23  
24 HIV-associated dementia: 10

25  
26 Other CNS complications: 9

27  
28  
29  
30 <sup>1</sup>Revised classification system for HIV: MMWR Dec 18; 41:1-19. 1993

31  
32  
33  
34 About half of the participants (51%) were born in Sweden (n = 182) and 177 (49%) outside  
35 Sweden, most commonly in sub-Saharan Africa (n = 93) (26%), Europe outside Sweden (n =  
36 37) (10%), and Asia (n = 35) (10%). The Covid-19 pandemic partially halted the study for a  
37 period. However, 166 PLWH (46%) had been followed for more than 5 years and 65 of these  
38 (18%) have been followed for more than 10 years, providing great opportunities for  
39 longitudinal evaluations. A total of 121 PLWH were diseased or lost to follow-up. The  
40 remaining 238 PLWH are eligible to ask for further follow-up (see flow chart Fig. 1).

41  
42  
43  
44 In addition, 94 HIV-negative healthy controls have been recruited for CSF/blood sampling, of  
45 whom 53 are men on HIV pre-exposure prophylaxis (PrEP). Follow-up sampling of this  
46 cohort is ongoing.  
47  
48  
49  
50  
51  
52  
53  
54  
55  
56  
57  
58  
59  
60

1  
2  
3 Patient and public involvement: The local patient organization (PG vast) was regularly  
4 informed of the study and the results.  
5  
6  
7  
8  
9

#### 10 Validation of the study population

11  
12 PLWH whose CSF/blood was sampled only once and declined to continue the study because  
13 of discomfort from the initial LP, or were too sick for follow-up, or were below 18 years of  
14 age, or were lost to follow-up were registered in the reject log. That log included 247 PLWH  
15 with a mean age of 40 years (range 2–76), of whom 74 (30%) were women and 173 (70%)  
16 were male. Their mean CD4 cell count was  $344 \times 10^6/L$ , (range 10–1420); 40% were  
17 classified as CDC stage C1-C3 (AIDS). The number of AIDS patients (40%) were larger than  
18 the longitudinal cohort group (22%), but otherwise age, gender, and CD4 cell count was of  
19 similar magnitude between the groups.  
20  
21  
22  
23  
24  
25  
26  
27  
28  
29  
30  
31  
32

#### 33 Cohort variables and laboratory analyses

34  
35 Full clinical history, including co-morbidity, treatment, and laboratory results were collected  
36 throughout the study. Variables recorded at enrolment included sex, country of birth, mode of  
37 HIV transmission, date of last HIV-negative test (if any), and first positive HIV-test, and  
38 suspected country for HIV transmission. Data collected/updated at each follow-up visit  
39 included ART, prophylaxis of opportunistic infections, and co-medications administered.  
40  
41 Data on co-infection with hepatitis C and B virus, weight, date and type of AIDS-defining  
42 events and non-AIDS events, and date and cause of death were also included. HIV-RNA,  
43 CD4+ and CD8+ T-cell counts and CD4/CD8 ratios, HIV subtype and HIV drug resistance  
44 (including viral sequences) were also recorded.  
45  
46  
47  
48  
49  
50  
51  
52  
53  
54  
55  
56  
57  
58  
59  
60

1  
2  
3 CSF and blood collection took place in the morning, before breakfast in a standardized  
4 manner with the subject in a lateral recumbent position. Twenty-four mL of CSF were  
5  
6 collected and centrifuged for cell counting. CSF cells and buffy coat were stored separately,  
7  
8 and cell-free CSF, serum, and plasma were divided into fractions. Fractions not immediately  
9  
10 analyzed were stored at  $-70^{\circ}\text{C}$  in the local laboratory after collection. In conjunction with  
11  
12 each LP, virological, immunological, and neuronal injury markers in the CSF were compared  
13  
14 with the clinical course. The laboratory analyses were grouped in three categories.  
15  
16  
17

- 18 1. Virology
- 19 2. Markers of inflammation and immunology
- 20 3. Markers of CNS injury

- 21 1. *Virology*: Since its introduction in 1996 quantitative HIV-1 RNA polymerase chain  
22 reaction (PCR) has been used as the main marker of viral load (currently Cobas  
23 Taqman v.2, Roche Diagnostic Systems, Hoffmann-La Roche, Inc., Basel,  
24 Switzerland). Quantitative HIV-1 DNA real-time PCR (TaqMan5' nuclease) assay has  
25 been analyzed in sub-populations. Prior to 1996, CSF HIV antigen test and virus  
26 isolation were included in the protocol.  
27  
28  
29 2. *Markers of inflammation and immunology*; Neopterin concentration reflects  
30 macrophage activity and has been the main marker of CSF inflammation (RIA  
31 method Henning test Neopterin, BRAHMS, Berlin Germany). Among other  
32 procedures CSF monocyte cell count, protein electrophoresis, oligoclonal bands, and  
33 beta-2-microglobulin concentration have been analyzed in all patients. Various  
34 cytokines such as MCP-1, IP-10, CXCL10, uPA, and suPAR have also been measured  
35 in sub-populations.  
36  
37  
38  
39  
40  
41  
42  
43  
44  
45  
46  
47  
48  
49  
50  
51  
52  
53  
54  
55  
56  
57  
58  
59  
60

- 1  
2  
3  
4  
5  
6 3. *Markers of CNS injury*: CSF neurofilament light protein (Nfl) concentration that  
7  
8 reflects axonal damage has been the main marker used to estimate CNS injury in CSF  
9  
10 (NF-light ELISA kit; Uman Diagnostics AB, Umeå, Sweden), and ultrasensitive  
11  
12 single molecule array (Simoa) method has been used for blood. Other markers such as  
13  
14 gangliosides (GM1, GD1a, GD1b, and GT1b), sulfatides, glial markers, including  
15  
16 GFAP (astroglia) and GD3 (microglial/macrophages), t-tau, p-tau, beta-amyloids, s-  
17  
18 APP and neurogranin (synapse protein) have been studied in sub-populations.  
19  
20  
21  
22  
23

#### 24 Neuropsychiatric test

25  
26 Reaction time tests have been performed in sub-populations (5) (6). Since 2011,  
27  
28 neurocognitive testing has been done with a computerized cognitive test battery (Cogstate,  
29  
30 Melbourne, Australia) that has been validated for HIV-infected individuals (7, 8). Four  
31  
32 different tests from the Cogstate Brief Battery were used to assess five cognitive domains: the  
33  
34 Detection Test measured psychomotor function and attention, the Identification test assessed  
35  
36 speed of information processing and attention, the One Card Learning test evaluated learning,  
37  
38 and the One Back memory test assessed working memory. (9)  
39  
40  
41  
42  
43  
44  
45  
46

## 47 RESULTS

48  
49 A general finding resulting from our 37-year study is that HIV-1 infection in the CNS, as  
50  
51 mirrored by CSF findings, appears early during the infectious course of the disease, and  
52  
53 progresses slowly in the vast majority of untreated PLWH. (10, 11) Combination ART has  
54  
55 been very effective in reducing CSF HIV-1 loads, inflammation, and markers of neural  
56  
57  
58  
59  
60

1  
2  
3 damage. (12, 13). However, minor CSF signs of long-term sequela or residual inflammatory  
4  
5 activity have been observed during follow-up. (14-17).  
6  
7  
8  
9

10 When several CSF specimens from the same individual were studied, HIV-1 could be  
11  
12 isolated from 80% of them and detected by PCR in 90% of cases, (10) with higher HIV-RNA  
13  
14 cutoff levels required in CSF than in blood to predict positive HIV-1 isolation. (18) The viral  
15  
16 load was approximately (mean) 1 log lower in CSF than in blood, (19-21) but CSF viral load  
17  
18 exceeded plasma levels (CSF > plasma discordance) in 13%, with variations between  
19  
20 different disease stages, ranging from 1% in primary HIV, 11% in neuroasymptomatic  
21  
22 patients, and up to 30% in patients with HIV-associated dementia. (19, 21) HIV-1 RNA  
23  
24 levels increased in CSF relative to time of infection. (11) Markers of immune stimulation  
25  
26 such as neopterin and beta-2 microglobulin also increased in CSF during follow-up,  
27  
28 indicating that HIV-1 CNS infection is progressive, even in a neurological asymptomatic  
29  
30 stage. (22) However, CSF pleocytosis decreased in PLWH with severe immunosuppression,  
31  
32 (15, 19, 21) probably because of T-cell deficiency.  
33  
34  
35  
36  
37  
38  
39

40 Monotherapy ART with zidovudine, the only existing drug at the beginning of the AIDS  
41  
42 epidemic, resulted in a 53 to 57% decrease in CSF neopterin concentrations. (23) The next  
43  
44 drug on the market, didanosine, had no such effect. (24). Zidovudine-resistant variants in the  
45  
46 brain developed during monotherapy. (25) It was obvious that combination treatment was  
47  
48 necessary to avoid viral resistance, and in 1996, when protease inhibitors was added to 2  
49  
50 nucleoside reverse transcriptase inhibitors (NRTI), a breakthrough in HIV care was achieved.  
51  
52 Blood HIV load decreased to numbers below 50 copies/ml in most PLWH, and those with  
53  
54 HIV-related symptoms clinically improved.  
55  
56  
57  
58  
59  
60

1  
2  
3 We found that ART was very effective in reducing viral load in CSF. Ultrasensitive PCR  
4 showed that highly effective combination treatment (HAART) resulted in undetectable HIV-1  
5 RNA copies in CSF, although the virus was still detectable in plasma. (12) (26). Several ART  
6 combinations proved virologically effective in CSF, (26-29) and reduced blood-brain barrier  
7 integrity and intrathecal immunoglobulin production. (30, 31). CSF markers of axonal injury  
8 were also normalized. (13, 17, 28, 32) .  
9  
10  
11  
12  
13  
14  
15  
16  
17  
18

19 Studies of the highly effective short-term effects of ART were followed by long-term studies.  
20 We found that CSF viral loads were effectively suppressed over long periods of observation,  
21 but CSF signs of slight immune activation were still present in many PLWH after several  
22 years of suppressive treatment. (14, 16, 33)  
23  
24  
25  
26  
27  
28  
29

30 While CNS infection is generally well controlled by systemic suppressive ART, there are  
31 exceptions when the HIV RNA load increases in the CSF despite suppression of the plasma  
32 viral load, a phenomenon referred to as asymptomatic CSF viral escape. (34) In these  
33 PLWH, CSF viral counts often reach just above 50 copies/ml without accompanying CSF  
34 pleocytosis or CSF signs of neuronal injury, measured as increased CSF concentration of  
35 Nfl. The lack of clinical symptoms, and the fact that the viral CSF increase was most often  
36 transient and reversed without changing therapy, has resulted in this condition to be  
37 interpreted as benign “CSF viral blips”, similar to plasma blips. (35) CSF escape is  
38 associated with increased CSF neopterin concentrations and may be related to the size of the  
39 CNS HIV reservoir. Correspondingly, residual CSF viral loads below the limit of  
40 quantification by standard assays also correlate with the degree of CSF immune activation in  
41 PLWH receiving suppressive ART. (26, 36) This reinforces the view that intrathecal immune  
42 activation is driven by persistent virus in the CNS. Nevertheless, similar to findings during  
43  
44  
45  
46  
47  
48  
49  
50  
51  
52  
53  
54  
55  
56  
57  
58  
59  
60

1  
2  
3 systemic infection, (37) treatment intensification does not seem to decrease the residual CSF  
4  
5 viral load or inflammation, (38, 39) suggesting that there is no ongoing HIV replication  
6  
7 during effective treatment.  
8  
9

10  
11  
12 Although it has not yet been definitely proven, data suggest that a stable permanent infection  
13  
14 of cells in the CNS is established later than in the systemic viral reservoirs, (40, 41) which are  
15  
16 highly concentrated in memory T-cell compartments within the first days of systemic HIV  
17  
18 infection. (42) When examining anti-HIV antibody formation as a surrogate marker for  
19  
20 antigen load and the size of the viral reservoir (43) in patients followed longitudinally during  
21  
22 early HIV infection, serum anti-HIV antibodies emerged in blood by day 30 in untreated  
23  
24 early infection, while CSF antibodies reached similar levels about 2 weeks later. (44) In  
25  
26 addition, high antibody levels, comparable to those observed in chronically infected subjects,  
27  
28 were reached several months later in CSF, as compared with blood. In addition, while  
29  
30 treatment of chronic infection resulted in only small reductions in levels of anti-HIV  
31  
32 antibodies in both CSF and serum, treatment during early infection substantially reduced CSF  
33  
34 levels of antibodies, sometimes to levels close to those in HIV-negative controls. In contrast,  
35  
36 antibody levels in serum were less affected, (44) altogether supporting this hypothesis. Our  
37  
38 findings and those from other groups further support compartmentalization of HIV infection  
39  
40 and immune activation in the CNS. (45-48)  
41  
42  
43  
44  
45  
46  
47  
48

49 The low-grade CNS immune activation found during suppressive ART may not be solely  
50  
51 ascribed to HIV itself, since co-morbidities, co-infections, and life-style related factors can  
52  
53 contribute, as elegantly shown in the COBRA study. (49, 50) The importance of appropriate  
54  
55 controls was also demonstrated in our HIV-negative PrEP controls in whom immune  
56  
57  
58  
59  
60

1  
2  
3 activation markers and signs of neuronal injury increased as compared to non-PrEP controls.  
4

5 (51)  
6  
7  
8  
9

10 Occasionally, CSF viral escape, i.e, viral load in CSF but not in blood, is accompanied by  
11 HIV-induced neurological and neurocognitive signs and symptoms, which have been defined  
12 as “symptomatic CSF escape”. (52-54) Another phenomenon that causes increased CSF viral  
13 load in well-treated PLWH is a concomitant infection in the nervous system. As an example,  
14 herpes zoster sometimes results in an inflammatory CSF reaction with slight pleocytosis,  
15 increased CSF neopterin concentrations, and increased CSF viral load, but with no detectable  
16 plasma virus. This phenomenon has been called “secondary CSF escape” and may be the  
17 result of latent virus released or detected from activated monocytes. (55)  
18  
19  
20  
21  
22  
23  
24  
25  
26  
27  
28  
29

## 30 **DISCUSSION**

31  
32 HIV-1 infects many compartments in the human body, including the CNS. CSF surrounds the  
33 brain and is a fluid accessible to LP, which can give valuable information on infectious  
34 activity and pathological processes in the CNS. As noted earlier, in our clinical cohort most  
35 participants were asymptomatic. It can be a challenge to enroll PLWH to do repeated LP. For  
36 this reason, most cohorts studying CSF only include participants with neurological and  
37 cognitive complications, or opportunistic CNS infections having limited follow-up. To survey  
38 the whole panorama of the infectious course, we have a long-lasting collaboration with other  
39 centers, the most important being cohorts at UCSF, San Francisco, CA, USA, and Milan  
40 Italy. This enables us to compare our cohort with a large number of PLWH suffering from  
41 AIDS dementia complex and other CNS complications.  
42  
43  
44  
45  
46  
47  
48  
49  
50  
51  
52  
53  
54  
55  
56  
57  
58  
59  
60



1  
2  
3 HIV infection changed dramatically in severity since we began this study in 1985. At that  
4  
5 time, we had no idea that a combination of antiretroviral drugs could have such impact. The  
6  
7 natural course of the infection was observed with considerable data showing progressive CNS  
8  
9 disease in several PLWH. When ART was introduced, the longitudinal project changed to  
10  
11 monitor whether CSF viral load, markers of inflammation, and CNS injury became  
12  
13 normalized. Some early medication with monotherapy had a limited short-term effect. It was  
14  
15 not until 1996 when highly active antiretroviral treatment (HAART) with 3 drugs began that  
16  
17 the disease became a chronic latent infection with a long-life expectancy and a high quality of  
18  
19 life. However, PLWH must remain life-long on ART. Luckily, up to now there are many  
20  
21 modern drugs to choose from with no or minor adverse events.  
22  
23  
24  
25  
26  
27

28  
29 There has been a debate over whether the most frequently used criteria for cognitive  
30  
31 impairment in people with HIV, namely the Frascati criteria developed in 2007 (56)  
32  
33 overestimate cognitive impairment. New criteria that are more appropriate for the modern era  
34  
35 have been sought. (57, 58) The significance of mild forms of neurocognitive disorders and  
36  
37 asymptomatic cognitive impairment detected in well-treated PLWH are controversial.  
38  
39 Furthermore, if this condition exist, are they progressive or reversible?(2, 59). Increased CSF  
40  
41 inflammation has been reported in PLWH on suppressive ART who experience mild  
42  
43 cognitive impairment, (60) but the implications of this are yet to be settled. The role of aging,  
44  
45 underlying diseases, and life-style factors of mild neurocognitive disorder are largely  
46  
47 unknown. In such patients, longitudinal CSF studies are helpful to determine pathogenic  
48  
49 factors that may affect the CNS.  
50  
51  
52  
53  
54  
55

56  
57 Despite our intention to follow participants annually, it was difficult to accomplish. Some  
58  
59 participants consented to repeated LP, but at longer intervals than annually. Moreover, the  
60

1  
2  
3 Covid-19 pandemic halted several clinical studies for two years. Another limitation is that our  
4 cohort included relatively few PLWH with advanced disease and CNS complications. By  
5 means of international collaborations, more CSF data from patients with severe neurological  
6 complications and opportunistic CNS infections have been used for comparison with our  
7 cohort data in several cross-sectional studies. A limitation is also the infrequent use of  
8 extensive neuropsychiatric test batteries. Several attempts to include regular neuropsychiatric  
9 tests in the protocol failed due to methodological difficulties and a lack of resources.  
10  
11 Furthermore, it was difficult to enroll a valid control group. Another complication while  
12 managing neuropsychiatric analyses in longitudinal studies involving repeated tests is the  
13 learning factor, which may result in false test results. In addition, there were many  
14 participants with language difficulties.  
15  
16  
17  
18  
19  
20  
21  
22  
23  
24  
25  
26  
27  
28  
29  
30

31 A major strength of our study is its uniquely long follow-up time, with CSF data from a  
32 population of PLWH with a predominately neuroasymptomatic clinical appearance, which  
33 we believe has never been done before. In addition, the study was performed with a very  
34 strict protocol for collecting and storing CSF/blood samples at one center, and only engaging  
35 a handful of clinicians to enhance consistency and uniformity.  
36  
37  
38  
39  
40  
41  
42  
43  
44

45 Our future objectives involve several questions. Are there any active, ongoing inflammatory  
46 or neurotoxic processes remaining in the brain, despite successful virological treatment? Are  
47 there any complications from the CNS caused by chronic antiretroviral medication?  
48  
49

50 Characterization of the CNS HIV reservoir and its establishment is still largely unknown.

51 What is the importance of compartmentalized CNS infection, and if peripheral eradication  
52 treatment in the blood and the lymphatic system proves successful in the future, is it possible  
53  
54  
55  
56  
57  
58  
59  
60

bring about the same effect in the CNS? The study will continue with follow-up of already included participants and recruitment of newly diagnosed PLWH.

### **Ethics**

At the time of HIV diagnosis, each person being diagnosed is asked for consent to be included in the study, and to decline without stating any reasons. Participants always have the right to exit the study. They may also request an extract of their data from the register, at no charge, in accordance with the European General Data Protection Regulation (GDPR 2016/679) and the Swedish Data Protection Act (2018:218). The study is approved by the Regional Ethics Review Board in Gothenburg, Sweden (Ö588-01) and performed in accordance with the Helsinki Declaration. All participants gave their informed consent.

**Biobank:** Sahlgrenska University Hospital, Gothenburg, Sweden, no. 890

**International collaborations:** Collaborations with HIV cohorts from other countries:

University of California (UCSF); Prof. Richard W Price; University of Milano, Italy; Prof. Paola Cinque; University of Sydney, Australia; Prof. Bruce Brew; University of Innsbruck, Austria, Prof. Dietmar Fuchs; University of North Carolina (UNC), Chapel Hill; Prof. Ron Swanstrom.

**Author affiliation:** Department of Infectious Diseases, Institute of Biomedicine, Sahlgrenska Academy, University of Gothenburg, Gothenburg, Sweden; and Region Västra Götaland, Sahlgrenska University Hospital, Gothenburg, Sweden.

1  
2  
3 **Authors contribution:** LH and MG designed the study, examined and collected CSF from  
4  
5 the majority of the participants, registered the results, and wrote the paper with equal  
6  
7 contribution.  
8  
9

10  
11  
12 **Funding to report for this paper:** This work was supported by the Swedish state under an  
13  
14 agreement between the Swedish government and the county councils (grant ALFGBG-  
15  
16 965885).  
17  
18

19  
20  
21 **Competing interests:** LH has no competing interest. MG has received research grants from  
22  
23 Gilead Sciences and Janssen-Cilag, and honoraria as a speaker and/or scientific advisor from  
24  
25 Amgen, AstraZeneca, Biogen, Bristol-Myers Squibb, Gilead Sciences,  
26  
27 GlaxoSmithKline/ViiV, Janssen-Cilag, MSD, Novocure, Novo Nordic, Pfizer and Sanofi.  
28  
29  
30

31  
32  
33 **Patient consent for publication:** Not required  
34  
35

36  
37 **Provenance and peer review:** Not commissioned; externally peer reviewed.  
38  
39

40  
41  
42 **Data availability statement:** Data can be made available upon legitimate request pending  
43  
44 ethical approval.  
45  
46  
47  
48  
49  
50  
51  
52  
53  
54  
55  
56  
57  
58  
59  
60

## References

1. Dore GJ, Correll PK, Li Y, et al. Changes to AIDS dementia complex in the era of highly active antiretroviral therapy. *AIDS* 1999;13(10):1249–53.
2. McArthur JC, Brew BJ, Nath A. Neurological complications of HIV infection. *Lancet Neurol* 2005;4(9):543–55.
3. Hagberg L, Malmvall BE, Svennerholm L, et al. Guillain-Barre syndrome as an early manifestation of HIV central nervous system infection. *Scand J Infect Dis* 1986;18(6):591–2.
4. Chiodi F, Asjo B, Fenyo EM, et al. Isolation of human immunodeficiency virus from cerebrospinal fluid of antibody-positive virus carrier without neurological symptoms. *Lancet* 1986;2(8518):1276–7.
5. Dunlop O, Bjorklund RA, Abdelnoor M, et al. Five different tests of reaction time evaluated in HIV seropositive men. *Acta Neurol Scand* 1992;86(3):260–6.
6. Mellgren A, Norkrans G, Hagberg L, et al. Slowed reaction time in HIV-1-infected patients without AIDS. *Acta Neurol Scand* 2000;102(3):169–74.
7. Cysique LA, Maruff P, Darby D, et al. The assessment of cognitive function in advanced HIV-1 infection and AIDS dementia complex using a new computerised cognitive test battery. *Arch Clin Neuropsychol* 2006;21(2):185–94.
8. Maruff P, Thomas E, Cysique L, et al. Validity of the CogState brief battery: relationship to standardized tests and sensitivity to cognitive impairment in mild traumatic brain injury, schizophrenia, and AIDS dementia complex. *Arch Clin Neuropsychol* 2009;24(2):165–78.
9. Yilmaz A, Mellgren A, Fuchs D, et al. Switching from a regimen containing abacavir/lamivudine or emtricitabine/tenofovir disoproxil fumarate to emtricitabine/tenofovir alafenamide fumarate does not affect central nervous system HIV-1 infection. *Infect Dis (Lond)* 2019;51(11–12):838–46.

- 1  
2  
3 10. Chiodi F, Keys B, Albert J, et al. Human immunodeficiency virus type 1 is present in the  
4 cerebrospinal fluid of a majority of infected individuals. *J Clin Microbiol* 1992;30(7):1768–  
5  
6 71.  
7  
8  
9  
10 11. Gisslen M, Hagberg L, Fuchs D, et al. Cerebrospinal fluid viral load in HIV-1-infected  
11 patients without antiretroviral treatment: a longitudinal study. *J Acquir Immune Defic Syndr*  
12  
13 *Hum Retrovirol* 1998;17(4):291–5.  
14  
15  
16 12. Gisslen M, Norkrans G, Svennerholm B, et al. HIV-1 RNA detectable with ultrasensitive  
17 quantitative polymerase chain reaction in plasma but not in cerebrospinal fluid during  
18 combination treatment with zidovudine, lamivudine and indinavir. *AIDS* 1998;12(1):114–6.  
19  
20  
21 13. Abdulle S, Mellgren A, Brew BJ, et al. CSF neurofilament protein (NFL)—a marker of  
22 active HIV-related neurodegeneration. *J Neurol* 2007;254(8):1026–32.  
23  
24  
25 14. Eden A, Price RW, Spudich S, et al. Immune activation of the central nervous system is  
26 still present after > 4 years of effective highly active antiretroviral therapy. *J Infect Dis*  
27 2007;196(12):1779–83.  
28  
29  
30 15. Hagberg L, Forsman A, Norkrans G, et al. Cytological and immunoglobulin findings in  
31 cerebrospinal fluid of symptomatic and asymptomatic human immunodeficiency virus (HIV)  
32 seropositive patients. *Infection* 1988;16(1):13–8.  
33  
34  
35 16. Ulfhammer G, Eden A, Mellgren A, et al. Persistent central nervous system immune  
36 activation following more than 10 years of effective HIV antiretroviral treatment. *AIDS*  
37 2018;32(15):2171–8.  
38  
39  
40 17. Jessen Krut J, Mellberg T, Price RW, et al. Biomarker evidence of axonal injury in  
41 neuroasymptomatic HIV-1 patients. *PLoS One* 2014;9(2):e88591.  
42  
43  
44 18. Andersson LM, Svennerholm B, Hagberg L, et al. Higher HIV-1 RNA cutoff level  
45 required in cerebrospinal fluid than in blood to predict positive HIV-1 isolation. *J Med Virol*  
46 2000;62(1):9–13.  
47  
48  
49  
50  
51  
52  
53  
54  
55  
56  
57  
58  
59  
60

- 1  
2  
3 19. Gisslen M, Fuchs D, Svennerholm B, et al. Cerebrospinal fluid viral load, intrathecal  
4 immunoactivation, and cerebrospinal fluid monocytic cell count in HIV-1 infection. *J Acquir*  
5  
6 *Immune Defic Syndr* 1999;21(4):271–6.  
7  
8  
9  
10 20. Spudich SS, Nilsson AC, Lollo ND, et al. Cerebrospinal fluid HIV infection and  
11  
12 pleocytosis: relation to systemic infection and antiretroviral treatment. *BMC Infect Dis*  
13  
14 2005;5:98.  
15  
16  
17 21. Ulfhammer G, Eden A, Antinori A, et al. Cerebrospinal fluid viral load across the  
18  
19 spectrum of untreated HIV-1 infection: a cross-sectional multi-center study. *Clin Infect Dis*  
20  
21 2022;75(3):493–502.  
22  
23  
24 22. Gisslen M, Chiodi F, Fuchs D, et al. Markers of immune stimulation in the cerebrospinal  
25  
26 fluid during HIV infection: a longitudinal study. *Scand J Infect Dis* 1994;26(5):523–33.  
27  
28  
29 23. Hagberg L, Norkrans G, Andersson M, et al. Cerebrospinal fluid neopterin and beta 2-  
30  
31 microglobulin levels in neurologically asymptomatic HIV-infected patients before and after  
32  
33 initiation of zidovudine treatment. *Infection* 1992;20(6):313–5.  
34  
35  
36 24. Hagberg L, Norkrans G, Gisslen M, et al. Intrathecal immunoactivation in patients with  
37  
38 HIV-1 infection is reduced by zidovudine but not by didanosine. *Scand J Infect Dis*  
39  
40 1996;28(4):329–33.  
41  
42  
43 25. Di Stefano M, Norkrans G, Chiodi F, et al. Zidovudine-resistant variants of HIV-1 in  
44  
45 brain. *Lancet* 1993;342(8875):865.  
46  
47  
48 26. Yilmaz A, Svennerholm B, Hagberg L, et al. Cerebrospinal fluid viral loads reach less  
49  
50 than 2 copies/ml in HIV-1-infected patients with effective antiretroviral therapy. *Antivir Ther*  
51  
52 2006;11(7):833–7.  
53  
54  
55 27. Gisslen M, Svennerholm B, Fuchs D, et al. Neurological efficacy of stavudine,  
56  
57 zidovudine, and lamivudine. *Lancet* 1998;352(9125):402–3.  
58  
59  
60

- 1  
2  
3 28. Mellgren A, Price RW, Hagberg L, et al. Antiretroviral treatment reduces increased CSF  
4 neurofilament protein (NFL) in HIV-1 infection. *Neurology* 2007;69(15):1536–41.  
5  
6  
7 29. Yilmaz A, Stahle L, Hagberg L, et al. Cerebrospinal fluid and plasma HIV-1 RNA levels  
8 and lopinavir concentrations following lopinavir/ritonavir regimen. *Scand J Infect Dis*  
9  
10 2004;36(11–12):823–8.  
11  
12  
13 30. Abdulle S, Hagberg L, Gisslen M. Effects of antiretroviral treatment on blood-brain  
14 barrier integrity and intrathecal immunoglobulin production in neuroasymptomatic HIV-1-  
15 infected patients. *HIV Med* 2005;6(3):164–9.  
16  
17  
18 31. Anesten B, Zetterberg H, Nilsson S, et al. Effect of antiretroviral treatment on blood-brain  
19 barrier integrity in HIV-1 infection. *BMC Neurol* 2021;21(1):494.  
20  
21  
22 32. Yilmaz A, Blennow K, Hagberg L, et al. Neurofilament light chain protein as a marker of  
23 neuronal injury: review of its use in HIV-1 infection and reference values for HIV-negative  
24 controls. *Expert Rev Mol Diagn* 2017;17(8):761–70.  
25  
26  
27 33. Yilmaz A, Yiannoutsos CT, Fuchs D, et al. Cerebrospinal fluid neopterin decay  
28 characteristics after initiation of antiretroviral therapy. *J Neuroinflammation* 2013;10:62.  
29  
30  
31 34. Eden A, Fuchs D, Hagberg L, et al. HIV-1 viral escape in cerebrospinal fluid of subjects  
32 on suppressive antiretroviral treatment. *J Infect Dis* 2010;202(12):1819–25.  
33  
34  
35 35. Eden A, Nilsson S, Hagberg L, et al. Asymptomatic cerebrospinal fluid HIV-1 viral blips  
36 and viral escape during antiretroviral therapy: a longitudinal study. *J Infect Dis*  
37 2016;214(12):1822–5.  
38  
39  
40 36. Dahl V, Peterson J, Fuchs D, et al. Low levels of HIV-1 RNA detected in the  
41 cerebrospinal fluid after up to 10 years of suppressive therapy are associated with local  
42 immune activation. *AIDS* 2014;28(15):2251–8.  
43  
44  
45  
46  
47  
48  
49  
50  
51  
52  
53  
54  
55  
56  
57  
58  
59  
60



- 1  
2  
3 37. Dinoso JB, Kim SY, Wiegand AM, et al. Treatment intensification does not reduce  
4 residual HIV-1 viremia in patients on highly active antiretroviral therapy. *Proc Natl Acad Sci*  
5 *USA* 2009;106(23):9403–8.  
6  
7  
8  
9  
10 38. Dahl V, Lee E, Peterson J, et al. Raltegravir treatment intensification does not alter  
11 cerebrospinal fluid HIV-1 infection or immunoactivation in subjects on suppressive therapy.  
12 *J Infect Dis* 2011;204(12):1936–45.  
13  
14  
15  
16  
17 39. Yilmaz A, Verhofstede C, D’Avolio A, et al. Treatment intensification has no effect on  
18 the HIV-1 central nervous system infection in patients on suppressive antiretroviral therapy. *J*  
19 *Acquir Immune Defic Syndr* 2010;55(5):590–6.  
20  
21  
22  
23  
24 40. Hellmuth J, Slike BM, Sacdalan C, et al. Very early initiation of antiretroviral therapy  
25 during acute HIV infection is associated with normalized levels of immune activation  
26 markers in cerebrospinal fluid but not in plasma. *J Infect Dis* 2019;220(12):1885–91.  
27  
28  
29  
30  
31 41. Gisslen M, Hunt PW. Antiretroviral treatment of acute HIV infection normalizes levels of  
32 cerebrospinal fluid markers of central nervous system (CNS) inflammation: a consequence of  
33 a reduced CNS reservoir? *J Infect Dis* 2019;220(12):1867–9.  
34  
35  
36  
37  
38 42. Hunt PW, Lee SA, Siedner MJ. Immunologic biomarkers, morbidity, and mortality in  
39 treated HIV infection. *J Infect Dis* 2016;214 Suppl 2:S44–50.  
40  
41  
42  
43 43. Lee SA, Bacchetti P, Chomont N, et al. Anti-HIV antibody responses and the HIV  
44 reservoir size during antiretroviral therapy. *PLoS One* 2016;11(8):e0160192.  
45  
46  
47  
48 44. Burbelo PD, Price RW, Hagberg L, et al. Anti-human immunodeficiency virus antibodies  
49 in the cerebrospinal fluid: evidence of early treatment impact on central nervous system  
50 reservoir? *J Infect Dis* 2018;217(7):1024–32.  
51  
52  
53  
54 45. Bednar MM, Sturdevant CB, Tompkins LA, et al. Compartmentalization, viral evolution,  
55 and viral latency of HIV in the CNS. *Curr HIV/AIDS Rep* 2015;12(2):262–71.  
56  
57  
58  
59  
60

- 1  
2  
3 46. Joseph SB, Kincer LP, Bowman NM, et al. Human immunodeficiency virus type 1 RNA  
4 detected in the central nervous system (CNS) after years of suppressive antiretroviral therapy  
5 can originate from a replicating CNS reservoir or clonally expanded cells. *Clin Infect Dis*  
6  
7 2019;69(8):1345–52.  
8  
9  
10  
11 47. Gisslen M, Svennerholm B, Norkrans G, et al. Cerebrospinal fluid and plasma viral load  
12 in HIV-1-infected patients with various anti-retroviral treatment regimens. *Scand J Infect Dis*  
13 2000;32(4):365–9.  
14  
15  
16 48. Gisslen M, Keating SM, Spudich S, et al. Compartmentalization of cerebrospinal fluid  
17 inflammation across the spectrum of untreated HIV-1 infection, central nervous system injury  
18 and viral suppression. *PLoS One* 2021;16(5):e0250987.  
19  
20  
21 49. De Francesco D, Wit FW, Burkle A, et al. Do people living with HIV experience greater  
22 age advancement than their HIV-negative counterparts? *AIDS* 2019;33(2):259–68.  
23  
24  
25 50. Booiman T, Wit FW, Maurer I, et al. High cellular monocyte activation in people living  
26 with human immunodeficiency virus on combination antiretroviral therapy and lifestyle-  
27 matched controls is associated with greater inflammation in cerebrospinal fluid. *Open Forum*  
28 *Infect Dis* 2017;4(3):ofx108.  
29  
30  
31 51. Robertson J, Eden A, Nystrom K, et al. Increased immune activation and signs of  
32 neuronal injury in HIV-negative people on preexposure prophylaxis. *AIDS*  
33 2021;35(13):2129–36.  
34  
35  
36 52. Canestri A, Lescure FX, Jaureguiberry S, et al. Discordance between cerebral spinal fluid  
37 and plasma HIV replication in patients with neurological symptoms who are receiving  
38 suppressive antiretroviral therapy. *Clin Infect Dis* 2010;50(5):773–8.  
39  
40  
41 53. Peluso MJ, Ferretti F, Peterson J, et al. Cerebrospinal fluid HIV escape associated with  
42 progressive neurologic dysfunction in patients on antiretroviral therapy with well controlled  
43 plasma viral load. *AIDS* 2012;26(14):1765–74.  
44  
45  
46  
47  
48  
49  
50  
51  
52  
53  
54  
55  
56  
57  
58  
59  
60

- 1  
2  
3 54. Ferretti F, Gisslen M, Cinque P, et al. Cerebrospinal fluid HIV escape from antiretroviral  
4 therapy. *Curr HIV/AIDS Rep* 2015;12(2):280–8.  
5  
6  
7 55. Hagberg L, Price RW, Zetterberg H, et al. Herpes zoster in HIV-1 infection: the role of  
8 CSF pleocytosis in secondary CSF escape and discordance. *PLoS One*. 2020;15(7):e0236162.  
9  
10  
11 56. Antinori A, Arendt G, Becker JT, et al. Updated research nosology for HIV-associated  
12 neurocognitive disorders. *Neurology* 2007;69(18):1789–99.  
13  
14  
15 57. Gisslen M, Price RW, Nilsson S. The definition of HIV-associated neurocognitive  
16 disorders: are we overestimating the real prevalence? *BMC Infect Dis* 2011;11:356.  
17  
18  
19 58. Nightingale S, Dreyer AJ, Saylor D, et al. Moving on from HAND: why we need new  
20 criteria for cognitive impairment in persons living with human immunodeficiency virus and a  
21 proposed way forward. *Clin Infect Dis* 2021;73(6):1113–8.  
22  
23  
24 59. Robertson KR, Smurzynski M, Parsons TD, et al. The prevalence and incidence of  
25 neurocognitive impairment in the HAART era. *AIDS* 2007;21(14):1915–21.  
26  
27  
28 60. Eden A, Marcotte TD, Heaton RK, et al. Increased intrathecal immune activation in  
29 virally suppressed HIV-1 infected patients with neurocognitive impairment. *PLoS One*  
30 2016;11(6):e0157160.  
31  
32  
33  
34  
35  
36  
37  
38  
39  
40  
41  
42  
43  
44  
45  
46  
47  
48  
49  
50  
51  
52  
53  
54  
55  
56  
57  
58  
59  
60

1  
2  
3 **Figure 1.** Flow chart of 662 people living with HIV (PLWH) included in the Gothenburg HIV  
4 CSF study (1985 to Apr 7, 2022).  
5  
6  
7  
8  
9  
10  
11  
12  
13  
14  
15  
16  
17  
18  
19  
20  
21  
22  
23  
24  
25  
26  
27  
28  
29  
30  
31  
32  
33  
34  
35  
36  
37  
38  
39  
40  
41  
42  
43  
44  
45  
46  
47  
48  
49  
50  
51  
52  
53  
54  
55  
56  
57  
58  
59  
60

For peer review only

1  
2  
3  
4  
5  
6  
7  
8  
9  
10  
11  
12  
13  
14  
15  
16  
17  
18  
19  
20  
21  
22  
23  
24  
25  
26  
27  
28  
29  
30  
31  
32  
33  
34  
35  
36  
37  
38  
39  
40  
41  
42  
43  
44  
45  
46  
47  
48  
49  
50  
51  
52  
53  
54  
55  
56  
57  
58  
59  
60

For peer review only

Figure 1

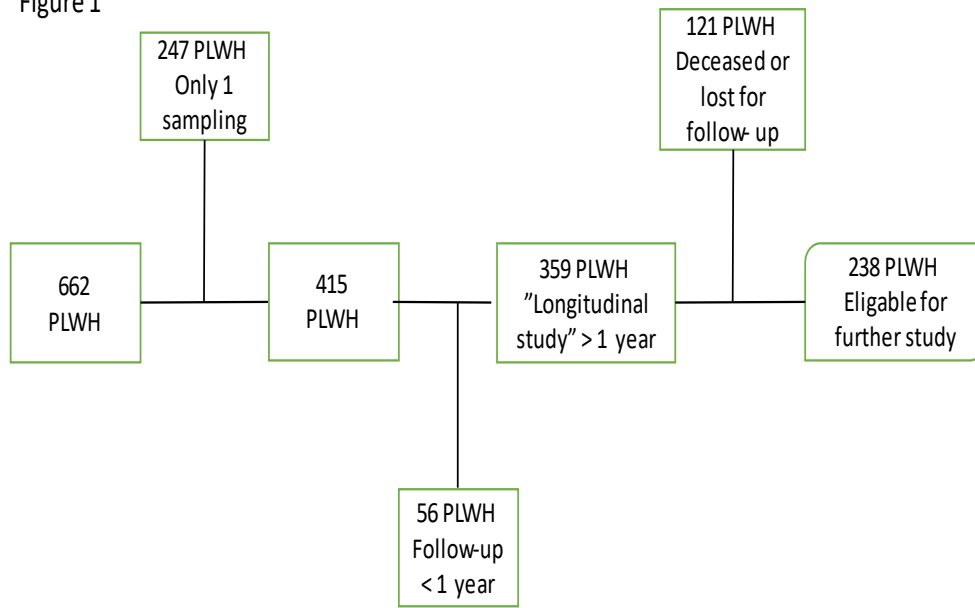

Review only

1  
2  
3  
4  
5  
6  
7  
8  
9  
10  
11  
12  
13  
14  
15  
16  
17  
18  
19  
20  
21  
22  
23  
24  
25  
26  
27  
28  
29  
30  
31  
32  
33  
34  
35  
36  
37  
38  
39  
40  
41  
42  
43  
44  
45  
46  
47  
48  
49  
50  
51  
52  
53  
54  
55  
56  
57  
58  
59  
60

# BMJ Open

## Cohort profile: A longitudinal study of HIV infection in the central nervous system with focus on cerebrospinal fluid- The Gothenburg HIV CSF Study Cohort

|                                 |                                                                                                                                                                                                                                                                                                      |
|---------------------------------|------------------------------------------------------------------------------------------------------------------------------------------------------------------------------------------------------------------------------------------------------------------------------------------------------|
| Journal:                        | <i>BMJ Open</i>                                                                                                                                                                                                                                                                                      |
| Manuscript ID                   | bmjopen-2022-070693.R1                                                                                                                                                                                                                                                                               |
| Article Type:                   | Cohort profile                                                                                                                                                                                                                                                                                       |
| Date Submitted by the Author:   | 31-Mar-2023                                                                                                                                                                                                                                                                                          |
| Complete List of Authors:       | Hagberg, Lars; University of Gothenburg, Department of Infectious Diseases<br>Gisslén, Magnus; University of Gothenburg Sahlgrenska Academy, Department of Infectious Diseases, Institute of Biomedicine; Sahlgrenska University Hospital, Department of Infectious Diseases, Region Västra Götaland |
| <b>Primary Subject Heading</b>: | Infectious diseases                                                                                                                                                                                                                                                                                  |
| Secondary Subject Heading:      | HIV/AIDS                                                                                                                                                                                                                                                                                             |
| Keywords:                       | HIV & AIDS < INFECTIOUS DISEASES, MICROBIOLOGY, Infectious disease/HIV < NEUROLOGY                                                                                                                                                                                                                   |
|                                 |                                                                                                                                                                                                                                                                                                      |

SCHOLARONE™  
Manuscripts



I, the Submitting Author has the right to grant and does grant on behalf of all authors of the Work (as defined in the below author licence), an exclusive licence and/or a non-exclusive licence for contributions from authors who are: i) UK Crown employees; ii) where BMJ has agreed a CC-BY licence shall apply, and/or iii) in accordance with the terms applicable for US Federal Government officers or employees acting as part of their official duties; on a worldwide, perpetual, irrevocable, royalty-free basis to BMJ Publishing Group Ltd ("BMJ") its licensees and where the relevant Journal is co-owned by BMJ to the co-owners of the Journal, to publish the Work in this journal and any other BMJ products and to exploit all rights, as set out in our [licence](#).

The Submitting Author accepts and understands that any supply made under these terms is made by BMJ to the Submitting Author unless you are acting as an employee on behalf of your employer or a postgraduate student of an affiliated institution which is paying any applicable article publishing charge ("APC") for Open Access articles. Where the Submitting Author wishes to make the Work available on an Open Access basis (and intends to pay the relevant APC), the terms of reuse of such Open Access shall be governed by a Creative Commons licence – details of these licences and which [Creative Commons](#) licence will apply to this Work are set out in our licence referred to above.

Other than as permitted in any relevant BMJ Author's Self Archiving Policies, I confirm this Work has not been accepted for publication elsewhere, is not being considered for publication elsewhere and does not duplicate material already published. I confirm all authors consent to publication of this Work and authorise the granting of this licence.



1  
2  
3  
4  
5  
6  
7  
8  
9  
10  
11  
12  
13  
14  
15  
16  
17  
18  
19  
20  
21  
22  
23  
24  
25  
26  
27  
28  
29  
30  
31  
32  
33  
34  
35  
36  
37  
38  
39  
40  
41  
42  
43  
44  
45  
46  
47  
48  
49  
50  
51  
52  
53  
54  
55  
56  
57  
58  
59  
60

## BMJ Open Cohort profile

**Title:** Cohort profile: A longitudinal study of HIV infection in the central nervous system with focus on cerebrospinal fluid-The Gothenburg HIV CSF Study Cohort

Authors: Lars Hagberg<sup>1,2</sup>, Magnus Gisslén<sup>1,2</sup>

1. Department of Infectious Diseases, Institute of Biomedicine, Sahlgrenska Academy, University of Gothenburg, Gothenburg, Sweden
2. Region Västra Götaland, Sahlgrenska University Hospital, Gothenburg, Sweden

Corresponding author: Lars Hagberg.

Postal address: Dept of Infectious Diseases, Sahlgrenska University Hospital SE 416 85 Gothenburg, Sweden.

Email: [lars.hagberg@gu.se](mailto:lars.hagberg@gu.se)

Word count: 3373

only

## ABSTRACT

**Purpose:** In order to enable long-term follow-up of the natural course of HIV infection in the central nervous system, a longitudinal cohort study with repeated cerebrospinal fluid (CSF) analyses at intervals over time was initiated in 1985. When antiretrovirals against HIV were introduced in the late 1980s, short- and long-term effects of various antiretroviral treatment (ART) regimens were added to the study.

**Participants:** All adults people living with HIV (PLWH) who were diagnosed at or referred to the Department of Infectious Diseases, Sahlgrenska University Hospital, Gothenburg, Sweden were asked to participate in the Gothenburg HIV CSF Study Cohort. PLWH with neurological symptoms or other clinical symptoms of HIV, as well as those with no symptoms of HIV infection were included. Most participants were asymptomatic which distinguishes this cohort from most other international HIV CSF studies. In addition, HIV-negative controls were recruited. These included people on HIV pre-exposure prophylaxis who served as life-style matched controls to HIV-infected men who have sex with men. Since lumbar puncture (LP) is an invasive procedure, some PLWH only consented to participate in one examination. Furthermore, at the beginning of the study several participants were lost to follow-up having died from AIDS. Of 662 PLWH where an initial LP was done, 415 agreed to continue with follow-up. Among the 415, 56 only gave permission to be followed with LP for less than 1 year, mainly to analyze the short-term effect of ART. The remaining 359 PLWH were followed-up with repeated LP for periods ranging from > 1 to 30 years. This group was defined as the “longitudinal cohort”. So far, on 7 April 2022, 2,650 LP and samplings of paired CSF/blood had been performed, providing a unique biobank.

**Findings to date:** A general finding during the 37-year study period was that HIV infection in the central nervous system, as mirrored by CSF findings, appears early in the infectious

1  
2  
3 course of the disease, and progresses slowly in the vast majority of untreated PLWH.

4  
5 Combination ART has been highly effective in reducing CSF viral counts, inflammation, and  
6  
7 markers of neural damage. Minor CSF signs of long-term sequels or residual inflammatory  
8  
9 activity and CSF escape (viral CSF blips) have been observed during follow-up. The future  
10  
11 course of these changes and their clinical impact require further studies.  
12  
13

14 **Future plans:** PLWH today have a life expectancy close to that of non-infected people.

15  
16 Therefore, our cohort provides a unique opportunity to study the long-term effects on HIV  
17  
18 infection in the central nervous system and the impact of ART, and is an ongoing study.  
19  
20  
21  
22

23  
24 Keywords: HIV infection, central nervous system, cerebrospinal fluid  
25  
26  
27

### 28 **Strengths and limitations**

- 29  
30
- 31 • Strength of our study is its uniquely long follow-up time, with CSF data from a  
32 population of PLWH with a predominately neuroasymptomatic clinical appearance.  
33
  - 34 • A strict protocol for collecting and storing CSF/blood samples at one center, and only  
35 engaging a handful of clinicians to enhance consistency and uniformity is another  
36 strength.  
37
  - 38 • Difficult to follow the protocol with yearly repeated LP in several participants due to  
39 consent and Covid-19 pandemic is a limitation.  
40
  - 41 • Infrequent use of extensive neuropsychiatric testing.  
42
  - 43 • Only limited number of participants suffering from severe neurological complications  
44 and opportunistic CNS infections  
45  
46  
47  
48  
49  
50  
51  
52  
53  
54  
55  
56  
57  
58  
59  
60

## INTRODUCTION

Chronic untreated HIV infection causes progressive immunodeficiency that leads to AIDS in a median of 10 or 11 years after a primary infection. Before effective treatment was available, HIV-associated dementia was frequently observed in the late stages of the infection. The introduction of combination antiretroviral treatment (ART), that preserves or restores immune functions has had a major impact on morbidity and mortality. It has also resulted in a marked reduction of HIV-associated dementia and other neurologic complications. (1) Nevertheless, mild forms of HIV-associated neurocognitive disorders have frequently been reported even during suppressive ART. (2) The research questions for the present study have been: Can biomarkers in cerebrospinal fluid (CSF) be used to chart the natural course of central nervous system (CNS) HIV infection, and can we determine the short and long-term effects of ART?

### Cohort description and method

#### Study population

The study was initiated in 1985 when two patients attending our clinic presented with Guillain Barre syndrome as a complication to HIV infection and exhibited HIV isolated in the CSF. (3) Later we found that HIV-1 could also be isolated in CSF of virus carriers who had no neurological symptoms. (4) At that time, it was not known that HIV was neurotropic.

Since 1985, HIV-infected people living with HIV (PLWH) in the Gothenburg area of Sweden have been enrolled in a longitudinal study with serial sampling of CSF and blood. Lumbar punctures (LP) are performed annually, if possible, or more frequently in connection with introduction or cessation of ART. Both PLWH with neurological or other clinical symptoms of HIV, and asymptomatic PLWH have been included in the study.

Of 662 PLWH in whom an initial LP was done, 415 PLWH agreed to continue with follow-up. Among the 415, 56 only gave permission to be followed with LP for less than 1 year, mainly to analyze the short-term effect of ART. The remaining 359 PLWH were followed with repeated LP for periods > 1 up to 30 years. This group was defined as the “longitudinal cohort” (see flow chart, Fig.1). The 247 PLWH who participated with only one CSF/blood sampling have been included in many cross-sectional studies. In this ongoing cohort study we present data from 1985 to 7 April 2022 including 2,650 paired CSF/blood samples, providing a unique and continuously growing biobank.

### Longitudinal cohort

In total, 359 PLWH were followed with a mean number of 6.26 (range 2–30) LP and CSF/blood analyses over a mean period of 6.89 years (range 1–30 years). Patient characteristics, time of follow-up, and number of CSF analyses is shown in Table 1, and time for inclusion and number PLWH still eligible for follow up is shown in table 2.

### Patient and Public Involvement

Development of the research question, outcome measures, and presentation of results has been done with the local PLWH organization PG Vast.

**Table 1. Longitudinal cohort characterization**

|                                           |                          |
|-------------------------------------------|--------------------------|
| Number of participants followed > 1 year: | 359                      |
| Mean time of follow-up:                   | 6.89 years (range 1–30)  |
| Number of lumbar punctures/individuals:   | 6.26 (range 2–30)        |
| Age at inclusion, mean:                   | 40.7 years (range 17–73) |
| Gender, male/female:                      | 247/112                  |

|                            |                            |
|----------------------------|----------------------------|
| Geographic background (n): | Sweden 182                 |
|                            | Europe (outside Sweden) 37 |
|                            | Africa 93                  |
|                            | Asia 35                    |
|                            | Middle East 3              |
|                            | America 9                  |

|                                               |                                                  |
|-----------------------------------------------|--------------------------------------------------|
| HIV1/HIV2                                     | 356/3                                            |
| mean CD4 <sup>+</sup> cells at inclusion:     | 369 x10 <sup>6</sup> /L (range 0–2131)           |
| CDC classification <sup>1</sup> at inclusion: | A1-A3 n = 244; B1-B3 n = 34; C1-C3 (AIDS) n = 81 |

|                       |                                                      |
|-----------------------|------------------------------------------------------|
| ART at inclusion (n): | No treatment: 298 (of whom 31 had primary infection) |
|                       | Treatment suppressed: 49                             |
|                       | Treatment failure: 11                                |
|                       | Treatment interruption: 1                            |

|                             |                             |
|-----------------------------|-----------------------------|
| Neurology at inclusion (n): | Neuroasymptomatic: 328      |
|                             | CNS opportunist: 12         |
|                             | HIV-associated dementia: 10 |
|                             | Other CNS complications: 9  |

---

<sup>1</sup>Revised classification system for HIV: MMWR Dec 18; 41:1-19. 1993

**Table 2. Time for inclusion (5 years interval) in the cohort study, number of LP:s, and number of PLWH still eligible for follow up.**

| PLWH No   | LP No (range) |            | PLWH still eligible No |
|-----------|---------------|------------|------------------------|
| 1985-1990 | 36            | 247 (2-20) | 5                      |
| 1990-1995 | 32            | 216 (2-30) | 7                      |
| 1995-2000 | 54            | 442 (2-27) | 22                     |
| 2000-2005 | 48            | 396 (2-19) | 33                     |
| 2005-2010 | 48            | 328 (2-19) | 40                     |
| 2010-2015 | 62            | 326 (2-16) | 57                     |
| 2015-2020 | 74            | 292 (2-7)  | 67                     |

About half of the participants (51%) were born in Sweden (n = 182) and 177 (49%) outside Sweden, most commonly in sub-Saharan Africa (n = 93) (26%), Europe outside Sweden (n = 37) (10%), and Asia (n = 35) (10%). The Covid-19 pandemic partially halted the study for a period. However, 166 PLWH (46%) had been followed for more than 5 years and 65 of these (18%) have been followed for more than 10 years, providing great opportunities for longitudinal evaluations. A total of 121 PLWH were diseased or lost to follow-up. The remaining 238 PLWH are eligible to ask for further follow-up (see flow chart Fig. 1).

In addition, 94 HIV-negative healthy controls have been recruited for CSF/blood sampling, of whom 53 are men on HIV pre-exposure prophylaxis (PrEP). Follow-up sampling of this cohort is ongoing.

Validation of the study population

1  
2  
3 PLWH whose CSF/blood was sampled only once and declined to continue the study because  
4 of discomfort from the initial LP, or were too sick for follow-up, or were below 18 years of  
5 age, or were lost to follow-up were registered in the reject log. That log included 247 PLWH  
6 with a mean age of 40.1 years (range 2–76), of whom 74 (30%) were women and 173 (70%)  
7 were male. Their mean CD4 cell count was  $344 \times 10^6/L$ , (range 10–1420); 40% were  
8 classified as CDC stage C1-C3 (AIDS). The number of AIDS patients (40%) were larger than  
9 the longitudinal cohort group (22%), but otherwise age, gender, and CD4 cell count was of  
10 similar magnitude between the groups.  
11  
12  
13  
14  
15  
16  
17  
18  
19  
20  
21  
22  
23

#### 24 Cohort variables and laboratory analyses

25 Full clinical history, including co-morbidity, treatment, and laboratory results were collected  
26 throughout the study. Variables recorded at enrolment included sex, country of birth, mode of  
27 HIV transmission, date of last HIV-negative test (if any), and first positive HIV-test, and  
28 suspected country for HIV transmission. Data collected/updated at each follow-up visit  
29 included ART, prophylaxis of opportunistic infections, and co-medications administered.  
30 Data on co-infection with hepatitis C and B virus, weight, date and type of AIDS-defining  
31 events and non-AIDS events, and date and cause of death were also included. HIV-RNA,  
32 CD4+ and CD8+ T-cell counts and CD4/CD8 ratios, HIV subtype and HIV drug resistance  
33 (including viral sequences) were also recorded.  
34  
35  
36  
37  
38  
39  
40  
41  
42  
43  
44  
45  
46  
47  
48  
49

50 CSF and blood collection took place in the morning, before breakfast in a standardized  
51 manner with the subject in a lateral recumbent position. Twenty-four mL of CSF were  
52 collected and centrifuged for cell counting. CSF cells and buffy coat were stored separately,  
53 and cell-free CSF, serum, and plasma were divided into fractions. Fractions not immediately  
54 analyzed were stored at  $-70^\circ\text{C}$  in the local laboratory after collection. In conjunction with  
55  
56  
57  
58  
59  
60



each LP. virological, immunological, and neuronal injury markers in the CSF were compared with the clinical course. The laboratory analyses were grouped in three categories.

1. Virology
  2. Markers of inflammation and immunology
  3. Markers of CNS injury
1. *Virology*: Since its introduction in 1996 quantitative HIV-1 RNA polymerase chain reaction (PCR) has been used as the main marker of viral load (currently Cobas Taqman v.2, Roche Diagnostic Systems, Hoffmann-La Roche, Inc., Basel, Switzerland). Quantitative HIV-1 DNA real-time PCR (TaqMan5' nuclease) assay has been analyzed in sub-populations. Prior to 1996, CSF HIV antigen test and virus isolation were included in the protocol.
  2. *Markers of inflammation and immunology*: Neopterin concentration reflects macrophage activity and has been the main marker of CSF inflammation (RIA method Henning test Neopterin, BRAHMS, Berlin Germany). Among other procedures CSF monocyte cell count, protein electrophoresis, oligoclonal bands, and beta-2-microglobulin concentration have been analyzed in all patients. Various cytokines such as MCP-1, IP-10, CXCL10, uPA, and suPAR have also been measured in sub-populations.
  3. *Markers of CNS injury*: CSF neurofilament light protein (Nfl) concentration that reflects axonal damage has been the main marker used to estimate CNS injury in CSF (NF-light ELISA kit; Uman Diagnostics AB, Umeå, Sweden), and ultrasensitive single molecule array (Simoa) method has been used for blood. Other markers such as

1  
2  
3 gangliosides (GM1, GD1a, GD1b, and GT1b), sulfatides, glial markers, including  
4  
5 GFAP (astroglia) and GD3 (microglial/macrophages), t-tau, p-tau, beta-amyloids, s-  
6  
7 APP and neurogranin (synapse protein) have been studied in sub-populations.  
8  
9

### 10 11 12 Neuropsychiatric test

13  
14 Reaction time tests have been performed in sub-populations (5) (6). Since 2011,  
15  
16 neurocognitive testing has been done with a computerized cognitive test battery (Cogstate,  
17  
18 Melbourne, Australia) that has been validated for HIV-infected individuals (7, 8). Four  
19  
20 different tests from the Cogstate Brief Battery were used to assess five cognitive domains: the  
21  
22 Detection Test measured psychomotor function and attention, the Identification test assessed  
23  
24 speed of information processing and attention, the One Card Learning test evaluated learning,  
25  
26 and the One Back memory test assessed working memory. (9)  
27  
28  
29  
30  
31  
32

### 33 Statistical methods

34  
35 In most studies Wilcoxon signed rank test was used to compare the variables before and after  
36  
37 treatment. Differences between groups were assessed with the Mann-Whitney U test.  
38  
39  
40  
41  
42

### 43 Collaboration

44  
45 Batches of CSF and serum samples are stored in -70°C in PLWH with clinical and laboratory  
46  
47 data described above, and will be available for potential collaborators studying biomarkers  
48  
49 during HIV infection.  
50  
51  
52  
53  
54  
55  
56  
57  
58  
59  
60

## RESULTS

A general finding resulting from our 37-year study is that HIV-1 infection in the CNS, as mirrored by CSF findings, appears early during the infectious course of the disease, and progresses slowly in the vast majority of untreated PLWH. (10, 11) Combination ART has been very effective in reducing CSF HIV-1 loads, inflammation, and markers of neural damage. (12, 13). However, minor CSF signs of long-term sequela or residual inflammatory activity have been observed during follow-up. (14-17).

When several CSF specimens from the same individual were studied, HIV-1 could be isolated from 80% of them and detected by PCR in 90% of cases, (10) with higher HIV-RNA cutoff levels required in CSF than in blood to predict positive HIV-1 isolation. (18) The viral load was approximately (mean) 1 log lower in CSF than in blood, (19-21) but CSF viral load exceeded plasma levels (CSF > plasma discordance) in 13%, with variations between different disease stages, ranging from 1% in primary HIV, 11% in neuroasymptomatic patients, and up to 30% in patients with HIV-associated dementia. (19, 21) HIV-1 RNA levels increased in CSF relative to time of infection. (11) Markers of immune stimulation such as neopterin and beta-2 microglobulin also increased in CSF during follow-up, indicating that HIV-1 CNS infection is progressive, even in a neurological asymptomatic stage. (22) However, CSF pleocytosis decreased in PLWH with severe immunosuppression, (15, 19, 21) probably because of T-cell deficiency.

Monotherapy ART with zidovudine, the only existing drug at the beginning of the AIDS epidemic, resulted in a 53 to 57% decrease in CSF neopterin concentrations. (23) The next drug on the market, didanosine, had no such effect. (24). Zidovudine-resistant variants in the brain developed during monotherapy. (25) It was obvious that combination treatment was

1  
2  
3 necessary to avoid viral resistance, and in 1996, when protease inhibitors was added to  
4  
5 nucleoside reverse transcriptase inhibitors (NRTI), a breakthrough in HIV care was achieved.  
6  
7 Blood HIV load decreased to numbers below 50 copies/ml in most PLWH, and those with  
8  
9 HIV-related symptoms clinically improved.  
10

11  
12 We found that ART was very effective in reducing viral load in CSF. Ultrasensitive PCR  
13  
14 showed that highly effective combination treatment (HAART) resulted in undetectable HIV-1  
15  
16 RNA copies in CSF, although the virus was still detectable in plasma. (12) (26). Several ART  
17  
18 combinations proved virologically effective in CSF, (26-29) and reduced blood-brain barrier  
19  
20 integrity and intrathecal immunoglobulin production. (30, 31). CSF markers of axonal injury  
21  
22 were also normalized. (13, 17, 28, 32) .  
23  
24  
25  
26  
27

28  
29 Studies of the highly effective short-term effects of ART were followed by long-term studies.  
30  
31 We found that CSF viral loads were effectively suppressed over long periods of observation,  
32  
33 but CSF signs of slight immune activation were still present in many PLWH after several  
34  
35 years of suppressive treatment. (14, 16, 33)  
36  
37  
38  
39

40  
41 While CNS infection is generally well controlled by systemic suppressive ART, there are  
42  
43 exceptions when the HIV RNA load increases in the CSF despite suppression of the plasma  
44  
45 viral load, a phenomenon referred to as asymptomatic CSF viral escape. (34) In these  
46  
47 PLWH, CSF viral counts often reach just above 50 copies/ml without accompanying CSF  
48  
49 pleocytosis or CSF signs of neuronal injury, measured as increased CSF concentration of  
50  
51 Nfl. The lack of clinical symptoms, and the fact that the viral CSF increase was most often  
52  
53 transient and reversed without changing therapy, has resulted in this condition to be  
54  
55 interpreted as benign “CSF viral blips”, similar to plasma blips. (35) CSF escape is  
56  
57 associated with increased CSF neopterin concentrations and may be related to the size of the  
58  
59  
60

1  
2  
3 CNS HIV reservoir. Correspondingly, residual CSF viral loads below the limit of  
4  
5 quantification by standard assays also correlate with the degree of CSF immune activation in  
6  
7 PLWH receiving suppressive ART. (26, 36) This reinforces the view that intrathecal immune  
8  
9 activation is driven by persistent virus in the CNS. Nevertheless, similar to findings during  
10  
11 systemic infection, (37) treatment intensification does not seem to decrease the residual CSF  
12  
13 viral load or inflammation, (38, 39) suggesting that there is no ongoing HIV replication  
14  
15 during effective treatment.  
16  
17  
18  
19  
20

21  
22 Although it has not yet been definitely proven, data suggest that a stable permanent infection  
23  
24 of cells in the CNS is established later than in the systemic viral reservoirs, (40, 41) which are  
25  
26 highly concentrated in memory T-cell compartments within the first days of systemic HIV  
27  
28 infection. (42) When examining anti-HIV antibody formation as a surrogate marker for  
29  
30 antigen load and the size of the viral reservoir (43) in patients followed longitudinally during  
31  
32 early HIV infection, serum anti-HIV antibodies emerged in blood by day 30 in untreated  
33  
34 early infection, while CSF antibodies reached similar levels about 2 weeks later. (44) In  
35  
36 addition, high antibody levels, comparable to those observed in chronically infected subjects,  
37  
38 were reached several months later in CSF, as compared with blood. In addition, while  
39  
40 treatment of chronic infection resulted in only small reductions in levels of anti-HIV  
41  
42 antibodies in both CSF and serum, treatment during early infection substantially reduced CSF  
43  
44 antibodies in both CSF and serum, treatment during early infection substantially reduced CSF  
45  
46 levels of antibodies, sometimes to levels close to those in HIV-negative controls. In contrast,  
47  
48 antibody levels in serum were less affected, (44) altogether supporting this hypothesis. Our  
49  
50 findings and those from other groups further support compartmentalization of HIV infection  
51  
52 and immune activation in the CNS. (45-48)  
53  
54  
55  
56  
57  
58  
59  
60

1  
2  
3 The low-grade CNS immune activation found during suppressive ART may not be solely  
4 ascribed to HIV itself, since co-morbidities, co-infections, and life-style related factors can  
5 contribute, as elegantly shown in the COBRA study. (49, 50) The importance of appropriate  
6 controls was also demonstrated in our HIV-negative PrEP controls in whom immune  
7 activation markers and signs of neuronal injury increased as compared to non-PrEP controls.  
8  
9  
10  
11  
12  
13  
14  
15 (51)

16  
17  
18  
19 Occasionally, CSF viral escape, i.e, viral load in CSF but not in blood, is accompanied by  
20 HIV-induced neurological and neurocognitive signs and symptoms, which have been defined  
21 as “symptomatic CSF escape”. (52-54) Another phenomenon that causes increased CSF viral  
22 load in well-treated PLWH is a concomitant infection in the nervous system. As an example,  
23 herpes zoster sometimes results in an inflammatory CSF reaction with slight pleocytosis,  
24 increased CSF neopterin concentrations, and increased CSF viral load, but with no detectable  
25 plasma virus. This phenomenon has been called “secondary CSF escape” and may be the  
26 result of latent virus released or detected from activated monocytes. (55)  
27  
28  
29  
30  
31  
32  
33  
34  
35  
36  
37  
38  
39

## 40 **DISCUSSION**

41  
42 HIV-1 infects many compartments in the human body, including the CNS. CSF surrounds the  
43 brain and is a fluid accessible to LP, which can give valuable information on infectious  
44 activity and pathological processes in the CNS. As noted earlier, in our clinical cohort most  
45 participants were asymptomatic. It can be a challenge to enroll PLWH to do repeated LP. For  
46 this reason, most cohorts studying CSF only include participants with neurological and  
47 cognitive complications, or opportunistic CNS infections having limited follow-up. To survey  
48 the whole panorama of the infectious course, we have a long-lasting collaboration with other  
49 centers, the most important being cohorts at UCSF, San Francisco, CA, USA, and Milan  
50  
51  
52  
53  
54  
55  
56  
57  
58  
59  
60

1  
2  
3 Italy. This enables us to compare our cohort with a large number of PLWH suffering from  
4  
5  
6 AIDS dementia complex and other CNS complications.  
7  
8  
9

10 HIV infection changed dramatically in severity since we began this study in 1985. At that  
11  
12 time, we had no idea that a combination of antiretroviral drugs could have such impact. The  
13  
14 natural course of the infection was observed with considerable data showing progressive CNS  
15  
16 disease in several PLWH. When ART was introduced, the longitudinal project changed to  
17  
18 monitor whether CSF viral load, markers of inflammation, and CNS injury became  
19  
20 normalized. Some early medication with monotherapy had a limited short-term effect. It was  
21  
22 not until 1996 when highly active antiretroviral treatment (HAART) with 3 drugs began that  
23  
24 the disease became a chronic latent infection with a long-life expectancy and a high quality of  
25  
26 life. However, PLWH must remain life-long on ART. Luckily, up to now there are many  
27  
28 modern drugs to choose from with no or minor adverse events.  
29  
30  
31  
32  
33  
34

35 There has been a debate over whether the most frequently used criteria for cognitive  
36  
37 impairment in people with HIV, namely the Frascati criteria developed in 2007 (56)  
38  
39 overestimate cognitive impairment. New criteria that are more appropriate for the modern era  
40  
41 have been sought. (57, 58) The significance of mild forms of neurocognitive disorders and  
42  
43 asymptomatic cognitive impairment detected in well-treated PLWH are controversial.  
44  
45 Furthermore, if this condition exist, are they progressive or reversible?(2, 59). Increased CSF  
46  
47 inflammation has been reported in PLWH on suppressive ART who experience mild  
48  
49 cognitive impairment, (60) but the implications of this are yet to be settled. The role of aging,  
50  
51 underlying diseases, and life-style factors of mild neurocognitive disorder are largely  
52  
53 unknown. In such patients, longitudinal CSF studies are helpful to determine pathogenic  
54  
55 factors that may affect the CNS.  
56  
57  
58  
59  
60

1  
2  
3  
4  
5  
6 Despite our intention to follow participants annually, it was difficult to accomplish. Some  
7  
8 participants consented to repeated LP, but at longer intervals than annually. Moreover, the  
9  
10 Covid-19 pandemic halted several clinical studies for two years. Another limitation is that our  
11  
12 cohort included relatively few PLWH with advanced disease and CNS complications. By  
13  
14 means of international collaborations, more CSF data from patients with severe neurological  
15  
16 complications and opportunistic CNS infections have been used for comparison with our  
17  
18 cohort data in several cross-sectional studies. A limitation is also the infrequent use of  
19  
20 extensive neuropsychiatric test batteries. Several attempts to include regular neuropsychiatric  
21  
22 tests in the protocol failed due to methodological difficulties and a lack of resources.  
23  
24 Furthermore, it was difficult to enroll a valid control group. Another complication while  
25  
26 managing neuropsychiatric analyses in longitudinal studies involving repeated tests is the  
27  
28 learning factor, which may result in false test results. In addition, there were many  
29  
30 participants with language difficulties.  
31  
32  
33  
34  
35  
36  
37

38 A major strength of our study is its uniquely long follow-up time, with CSF data from a  
39  
40 population of PLWH with a predominately neuroasymptomatic clinical appearance, which  
41  
42 we believe has never been done before. In addition, the study was performed with a very  
43  
44 strict protocol for collecting and storing CSF/blood samples at one center, and only engaging  
45  
46 a handful of clinicians to enhance consistency and uniformity.  
47  
48  
49  
50

51 Our future objectives involve several questions. Are there any active, ongoing inflammatory  
52  
53 or neurotoxic processes remaining in the brain, despite successful virological treatment? Are  
54  
55 there any complications from the CNS caused by chronic antiretroviral medication?  
56  
57

58 Characterization of the CNS HIV reservoir and its establishment is still largely unknown.  
59  
60



1  
2  
3 What is the importance of compartmentalized CNS infection, and if peripheral eradication  
4 treatment in the blood and the lymphatic system proves successful in the future, is it possible  
5 bring about the same effect in the CNS? The study will continue with follow-up of already  
6 included participants and recruitment of newly diagnosed PLWH.  
7  
8  
9  
10  
11  
12  
13

### 14 **Ethics**

15  
16 At the time of HIV diagnosis, each person being diagnosed is asked for consent to be  
17 included in the study, and to decline without stating any reasons. Participants always have the  
18 right to exit the study. They may also request an extract of their data from the register, at no  
19 charge, in accordance with the European General Data Protection Regulation (GDPR  
20 2016/679) and the Swedish Data Protection Act (2018:218).  
21  
22  
23  
24  
25  
26  
27  
28  
29

30 **Biobank:** Sahlgrenska University Hospital, Gothenburg, Sweden, no. 890  
31  
32  
33

34  
35 **International collaborations:** Collaborations with HIV cohorts from other countries:  
36 University of California (UCSF); Prof. Richard W Price; University of Milano, Italy; Prof.  
37 Paola Cinque; University of Sidney, Australia; Prof. Bruce Brew; University of Innsbruck,  
38 Austria, Prof. Dietmar Fuchs; University of North Carolina (UNC), Chapel Hill; Prof. Ron  
39 Swanstrom.  
40  
41  
42  
43  
44  
45  
46  
47  
48  
49

50  
51 **Authors contribution:** LH and MG designed the study, examined and collected CSF from  
52 the majority of the participants, registered the results, and wrote the paper with equal  
53 contribution.  
54  
55  
56  
57  
58  
59  
60

1  
2  
3 **Funding to report for this paper:** This work was supported by the Swedish state under an  
4 agreement between the Swedish government and the county councils (ALF agreement  
5 ALFGBG-965885) and the Swedish Research Council (2021-06545)  
6  
7  
8  
9  
10  
11

12 **Competing interests:** LH has no competing interest. MG has received research grants from  
13 Gilead Sciences and Janssen-Cilag, and honoraria as a speaker and/or scientific advisor from  
14 Amgen, AstraZeneca, Biogen, Bristol-Myers Squibb, Gilead Sciences,  
15 GlaxoSmithKline/ViiV, Janssen-Cilag, MSD, Novocure, Novo Nordic, Pfizer and Sanofi.  
16  
17  
18  
19  
20  
21  
22  
23

24 **Patient consent for publication:** Not required  
25  
26  
27

28 **Ethics approval:** This cohort study has been approved by the Swedish Ethics Review  
29 Authority.  
30  
31  
32  
33  
34

35 **Provenance and peer review:** Not commissioned; externally peer reviewed.  
36  
37  
38  
39

40 **Data availability statement:** Data can be made available upon legitimate request pending  
41 ethical approval.  
42  
43  
44  
45  
46  
47  
48  
49  
50  
51  
52  
53  
54  
55  
56  
57  
58  
59  
60

## References

1. Dore GJ, Correll PK, Li Y, et al. Changes to AIDS dementia complex in the era of highly active antiretroviral therapy. *AIDS* 1999;13(10):1249–53.
2. McArthur JC, Brew BJ, Nath A. Neurological complications of HIV infection. *Lancet Neurol* 2005;4(9):543–55.
3. Hagberg L, Malmvall BE, Svennerholm L, et al. Guillain-Barre syndrome as an early manifestation of HIV central nervous system infection. *Scand J Infect Dis* 1986;18(6):591–2.
4. Chiodi F, Asjo B, Fenyo EM, et al. Isolation of human immunodeficiency virus from cerebrospinal fluid of antibody-positive virus carrier without neurological symptoms. *Lancet* 1986;2(8518):1276–7.
5. Dunlop O, Bjorklund RA, Abdelnoor M, et al. Five different tests of reaction time evaluated in HIV seropositive men. *Acta Neurol Scand* 1992;86(3):260–6.
6. Mellgren A, Norkrans G, Hagberg L, et al. Slowed reaction time in HIV-1-infected patients without AIDS. *Acta Neurol Scand* 2000;102(3):169–74.
7. Cysique LA, Maruff P, Darby D, et al. The assessment of cognitive function in advanced HIV-1 infection and AIDS dementia complex using a new computerised cognitive test battery. *Arch Clin Neuropsychol* 2006;21(2):185–94.
8. Maruff P, Thomas E, Cysique L, et al. Validity of the CogState brief battery: relationship to standardized tests and sensitivity to cognitive impairment in mild traumatic brain injury, schizophrenia, and AIDS dementia complex. *Arch Clin Neuropsychol* 2009;24(2):165–78.
9. Yilmaz A, Mellgren A, Fuchs D, et al. Switching from a regimen containing abacavir/lamivudine or emtricitabine/tenofovir disoproxil fumarate to emtricitabine/tenofovir alafenamide fumarate does not affect central nervous system HIV-1 infection. *Infect Dis (Lond)* 2019;51(11–12):838–46.

10. Chiodi F, Keys B, Albert J, et al. Human immunodeficiency virus type 1 is present in the cerebrospinal fluid of a majority of infected individuals. *J Clin Microbiol* 1992;30(7):1768–71.
11. Gisslen M, Hagberg L, Fuchs D, et al. Cerebrospinal fluid viral load in HIV-1-infected patients without antiretroviral treatment: a longitudinal study. *J Acquir Immune Defic Syndr Hum Retrovirol* 1998;17(4):291–5.
12. Gisslen M, Norkrans G, Svennerholm B, et al. HIV-1 RNA detectable with ultrasensitive quantitative polymerase chain reaction in plasma but not in cerebrospinal fluid during combination treatment with zidovudine, lamivudine and indinavir. *AIDS* 1998;12(1):114–6.
13. Abdulle S, Mellgren A, Brew BJ, et al. CSF neurofilament protein (NFL)—a marker of active HIV-related neurodegeneration. *J Neurol* 2007;254(8):1026–32.
14. Eden A, Price RW, Spudich S, et al. Immune activation of the central nervous system is still present after > 4 years of effective highly active antiretroviral therapy. *J Infect Dis* 2007;196(12):1779–83.
15. Hagberg L, Forsman A, Norkrans G, et al. Cytological and immunoglobulin findings in cerebrospinal fluid of symptomatic and asymptomatic human immunodeficiency virus (HIV) seropositive patients. *Infection* 1988;16(1):13–8.
16. Ulfhammer G, Eden A, Mellgren A, et al. Persistent central nervous system immune activation following more than 10 years of effective HIV antiretroviral treatment. *AIDS* 2018;32(15):2171–8.
17. Jessen Krut J, Mellberg T, Price RW, et al. Biomarker evidence of axonal injury in neuroasymptomatic HIV-1 patients. *PLoS One* 2014;9(2):e88591.
18. Andersson LM, Svennerholm B, Hagberg L, et al. Higher HIV-1 RNA cutoff level required in cerebrospinal fluid than in blood to predict positive HIV-1 isolation. *J Med Virol* 2000;62(1):9–13.

19. Gisslen M, Fuchs D, Svennerholm B, et al. Cerebrospinal fluid viral load, intrathecal immunoactivation, and cerebrospinal fluid monocytic cell count in HIV-1 infection. *J Acquir Immune Defic Syndr* 1999;21(4):271–6.
20. Spudich SS, Nilsson AC, Lollo ND, et al. Cerebrospinal fluid HIV infection and pleocytosis: relation to systemic infection and antiretroviral treatment. *BMC Infect Dis* 2005;5:98.
21. Ulfhammer G, Eden A, Antinori A, et al. Cerebrospinal fluid viral load across the spectrum of untreated HIV-1 infection: a cross-sectional multi-center study. *Clin Infect Dis* 2022;75(3):493–502.
22. Gisslen M, Chiodi F, Fuchs D, et al. Markers of immune stimulation in the cerebrospinal fluid during HIV infection: a longitudinal study. *Scand J Infect Dis* 1994;26(5):523–33.
23. Hagberg L, Norkrans G, Andersson M, et al. Cerebrospinal fluid neopterin and beta 2-microglobulin levels in neurologically asymptomatic HIV-infected patients before and after initiation of zidovudine treatment. *Infection* 1992;20(6):313–5.
24. Hagberg L, Norkrans G, Gisslen M, et al. Intrathecal immunoactivation in patients with HIV-1 infection is reduced by zidovudine but not by didanosine. *Scand J Infect Dis* 1996;28(4):329–33.
25. Di Stefano M, Norkrans G, Chiodi F, et al. Zidovudine-resistant variants of HIV-1 in brain. *Lancet* 1993;342(8875):865.
26. Yilmaz A, Svennerholm B, Hagberg L, et al. Cerebrospinal fluid viral loads reach less than 2 copies/ml in HIV-1-infected patients with effective antiretroviral therapy. *Antivir Ther* 2006;11(7):833–7.
27. Gisslen M, Svennerholm B, Fuchs D, et al. Neurological efficacy of stavudine, zidovudine, and lamivudine. *Lancet* 1998;352(9125):402–3.

- 1  
2  
3 28. Mellgren A, Price RW, Hagberg L, et al. Antiretroviral treatment reduces increased CSF  
4 neurofilament protein (NFL) in HIV-1 infection. *Neurology* 2007;69(15):1536–41.  
5  
6  
7 29. Yilmaz A, Stahle L, Hagberg L, et al. Cerebrospinal fluid and plasma HIV-1 RNA levels  
8 and lopinavir concentrations following lopinavir/ritonavir regimen. *Scand J Infect Dis*  
9  
10 2004;36(11–12):823–8.  
11  
12  
13 30. Abdulle S, Hagberg L, Gisslen M. Effects of antiretroviral treatment on blood-brain  
14 barrier integrity and intrathecal immunoglobulin production in neuroasymptomatic HIV-1-  
15 infected patients. *HIV Med* 2005;6(3):164–9.  
16  
17  
18 31. Anesten B, Zetterberg H, Nilsson S, et al. Effect of antiretroviral treatment on blood-brain  
19 barrier integrity in HIV-1 infection. *BMC Neurol* 2021;21(1):494.  
20  
21  
22 32. Yilmaz A, Blennow K, Hagberg L, et al. Neurofilament light chain protein as a marker of  
23 neuronal injury: review of its use in HIV-1 infection and reference values for HIV-negative  
24 controls. *Expert Rev Mol Diagn* 2017;17(8):761–70.  
25  
26  
27 33. Yilmaz A, Yiannoutsos CT, Fuchs D, et al. Cerebrospinal fluid neopterin decay  
28 characteristics after initiation of antiretroviral therapy. *J Neuroinflammation* 2013;10:62.  
29  
30  
31 34. Eden A, Fuchs D, Hagberg L, et al. HIV-1 viral escape in cerebrospinal fluid of subjects  
32 on suppressive antiretroviral treatment. *J Infect Dis* 2010;202(12):1819–25.  
33  
34  
35 35. Eden A, Nilsson S, Hagberg L, et al. Asymptomatic cerebrospinal fluid HIV-1 viral blips  
36 and viral escape during antiretroviral therapy: a longitudinal study. *J Infect Dis*  
37  
38 2016;214(12):1822–5.  
39  
40  
41 36. Dahl V, Peterson J, Fuchs D, et al. Low levels of HIV-1 RNA detected in the  
42 cerebrospinal fluid after up to 10 years of suppressive therapy are associated with local  
43 immune activation. *AIDS* 2014;28(15):2251–8.  
44  
45  
46  
47  
48  
49  
50  
51  
52  
53  
54  
55  
56  
57  
58  
59  
60

- 1  
2  
3 37. Dinoso JB, Kim SY, Wiegand AM, et al. Treatment intensification does not reduce  
4 residual HIV-1 viremia in patients on highly active antiretroviral therapy. *Proc Natl Acad Sci*  
5  
6 *USA* 2009;106(23):9403–8.  
7  
8  
9  
10 38. Dahl V, Lee E, Peterson J, et al. Raltegravir treatment intensification does not alter  
11  
12 cerebrospinal fluid HIV-1 infection or immunoactivation in subjects on suppressive therapy.  
13  
14 *J Infect Dis* 2011;204(12):1936–45.  
15  
16  
17 39. Yilmaz A, Verhofstede C, D’Avolio A, et al. Treatment intensification has no effect on  
18  
19 the HIV-1 central nervous system infection in patients on suppressive antiretroviral therapy. *J*  
20  
21 *Acquir Immune Defic Syndr* 2010;55(5):590–6.  
22  
23  
24 40. Hellmuth J, Slike BM, Sacdalan C, et al. Very early initiation of antiretroviral therapy  
25  
26 during acute HIV infection is associated with normalized levels of immune activation  
27  
28 markers in cerebrospinal fluid but not in plasma. *J Infect Dis* 2019;220(12):1885–91.  
29  
30  
31 41. Gisslen M, Hunt PW. Antiretroviral treatment of acute HIV infection normalizes levels of  
32  
33 cerebrospinal fluid markers of central nervous system (CNS) inflammation: a consequence of  
34  
35 a reduced CNS reservoir? *J Infect Dis* 2019;220(12):1867–9.  
36  
37  
38 42. Hunt PW, Lee SA, Siedner MJ. Immunologic biomarkers, morbidity, and mortality in  
39  
40 treated HIV infection. *J Infect Dis* 2016;214 Suppl 2:S44–50.  
41  
42  
43 43. Lee SA, Bacchetti P, Chomont N, et al. Anti-HIV antibody responses and the HIV  
44  
45 reservoir size during antiretroviral therapy. *PLoS One* 2016;11(8):e0160192.  
46  
47  
48 44. Burbelo PD, Price RW, Hagberg L, et al. Anti-human immunodeficiency virus antibodies  
49  
50 in the cerebrospinal fluid: evidence of early treatment impact on central nervous system  
51  
52 reservoir? *J Infect Dis* 2018;217(7):1024–32.  
53  
54  
55 45. Bednar MM, Sturdevant CB, Tompkins LA, et al. Compartmentalization, viral evolution,  
56  
57 and viral latency of HIV in the CNS. *Curr HIV/AIDS Rep* 2015;12(2):262–71.  
58  
59  
60

- 1  
2  
3 46. Joseph SB, Kincer LP, Bowman NM, et al. Human immunodeficiency virus type 1 RNA  
4 detected in the central nervous system (CNS) after years of suppressive antiretroviral therapy  
5 can originate from a replicating CNS reservoir or clonally expanded cells. *Clin Infect Dis*  
6  
7 2019;69(8):1345–52.  
8  
9  
10  
11 47. Gisslen M, Svennerholm B, Norkrans G, et al. Cerebrospinal fluid and plasma viral load  
12 in HIV-1-infected patients with various anti-retroviral treatment regimens. *Scand J Infect Dis*  
13  
14 2000;32(4):365–9.  
15  
16  
17 48. Gisslen M, Keating SM, Spudich S, et al. Compartmentalization of cerebrospinal fluid  
18 inflammation across the spectrum of untreated HIV-1 infection, central nervous system injury  
19 and viral suppression. *PLoS One* 2021;16(5):e0250987.  
20  
21  
22 49. De Francesco D, Wit FW, Burkle A, et al. Do people living with HIV experience greater  
23 age advancement than their HIV-negative counterparts? *AIDS* 2019;33(2):259–68.  
24  
25  
26 50. Booiman T, Wit FW, Maurer I, et al. High cellular monocyte activation in people living  
27 with human immunodeficiency virus on combination antiretroviral therapy and lifestyle-  
28 matched controls is associated with greater inflammation in cerebrospinal fluid. *Open Forum*  
29  
30  
31  
32  
33  
34  
35  
36  
37  
38  
39  
40 51. Robertson J, Eden A, Nystrom K, et al. Increased immune activation and signs of  
41 neuronal injury in HIV-negative people on preexposure prophylaxis. *AIDS*  
42  
43 2021;35(13):2129–36.  
44  
45  
46 52. Canestri A, Lescure FX, Jaureguierry S, et al. Discordance between cerebral spinal fluid  
47 and plasma HIV replication in patients with neurological symptoms who are receiving  
48 suppressive antiretroviral therapy. *Clin Infect Dis* 2010;50(5):773–8.  
49  
50  
51  
52  
53 53. Peluso MJ, Ferretti F, Peterson J, et al. Cerebrospinal fluid HIV escape associated with  
54 progressive neurologic dysfunction in patients on antiretroviral therapy with well controlled  
55 plasma viral load. *AIDS* 2012;26(14):1765–74.  
56  
57  
58  
59  
60



- 1  
2  
3 54. Ferretti F, Gisslen M, Cinque P, et al. Cerebrospinal fluid HIV escape from antiretroviral  
4 therapy. *Curr HIV/AIDS Rep* 2015;12(2):280–8.  
5  
6  
7  
8 55. Hagberg L, Price RW, Zetterberg H, et al. Herpes zoster in HIV-1 infection: the role of  
9 CSF pleocytosis in secondary CSF escape and discordance. *PLoS One*. 2020;15(7):e0236162.  
10  
11  
12 56. Antinori A, Arendt G, Becker JT, et al. Updated research nosology for HIV-associated  
13 neurocognitive disorders. *Neurology* 2007;69(18):1789–99.  
14  
15  
16  
17 57. Gisslen M, Price RW, Nilsson S. The definition of HIV-associated neurocognitive  
18 disorders: are we overestimating the real prevalence? *BMC Infect Dis* 2011;11:356.  
19  
20  
21 58. Nightingale S, Dreyer AJ, Saylor D, et al. Moving on from HAND: why we need new  
22 criteria for cognitive impairment in persons living with human immunodeficiency virus and a  
23 proposed way forward. *Clin Infect Dis* 2021;73(6):1113–8.  
24  
25  
26  
27  
28 59. Robertson KR, Smurzynski M, Parsons TD, et al. The prevalence and incidence of  
29 neurocognitive impairment in the HAART era. *AIDS* 2007;21(14):1915–21.  
30  
31  
32  
33 60. Eden A, Marcotte TD, Heaton RK, et al. Increased intrathecal immune activation in  
34 virally suppressed HIV-1 infected patients with neurocognitive impairment. *PLoS One*  
35 2016;11(6):e0157160.  
36  
37  
38  
39  
40  
41  
42  
43  
44

45 **Figure 1.** Flow chart of 662 people living with HIV (PLWH) included in the Gothenburg HIV  
46 CSF study (1985 to Apr 7, 2022).  
47  
48  
49  
50  
51  
52  
53  
54  
55  
56  
57  
58  
59  
60

Figure 1

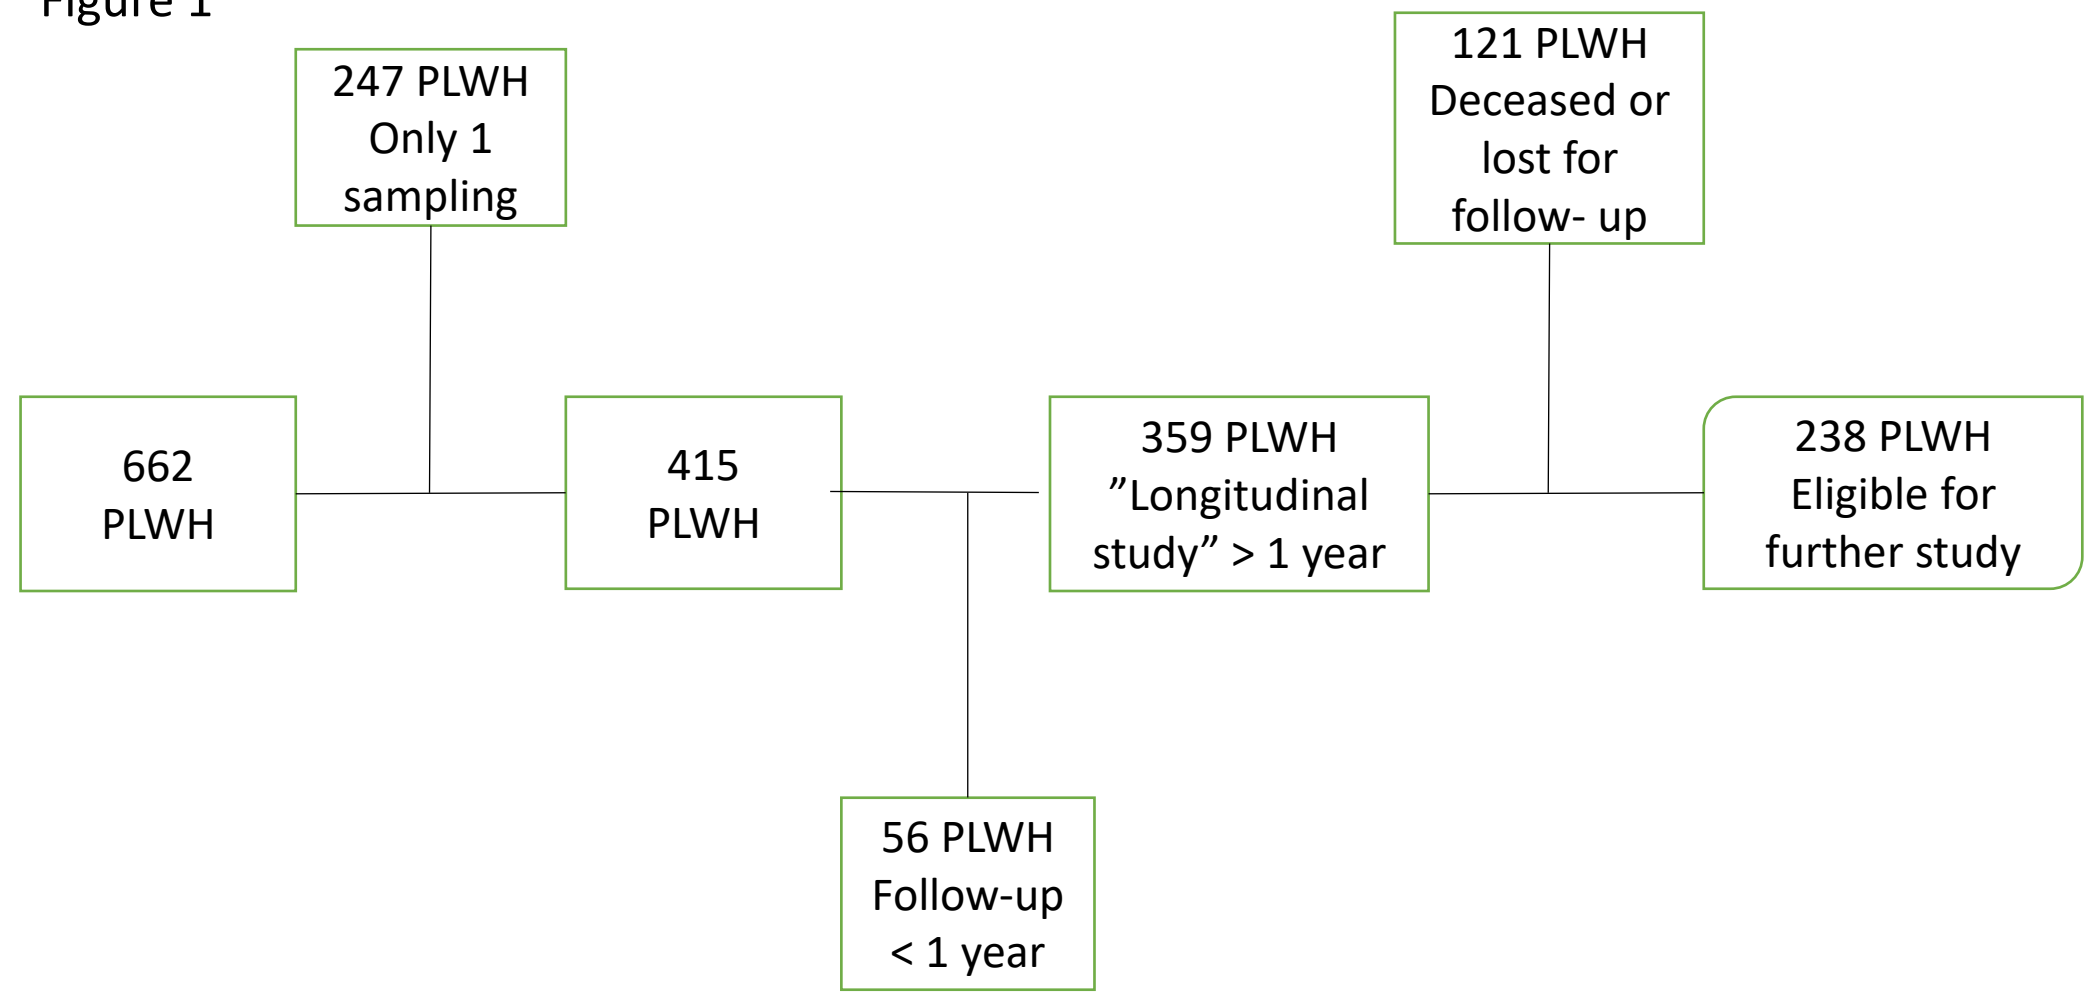

1  
2  
3  
4  
5  
6  
7  
8  
9  
10  
11  
12  
13  
14  
15  
16  
17  
18  
19  
20  
21  
22  
23  
24  
25  
26  
27  
28  
29  
30  
31  
32  
33  
34  
35  
36  
37  
38  
39  
40  
41
